# Supplementary material for: Correlation of diabetes and adverse outcomes in hospitalized COVID-19 patients admitted to a tertiary hospital in China during a small-scale COVID-19 outbreak
Source: PeerJ. 2025 Jan 27;13:e18865. doi: 10.7717/peerj.18865 (PMC11781264; doi:10.7717/peerj.18865)
Supplement: Supplemental Information 1 [file peerj-13-18865-s001.xlsx]

## Sheet: Sheet1
group	age	gender	Duration of symptoms prior to admission	Hospitalization Expenses	SBP	DBP	heart rate	height	weight	BMI	Length of stay in hospital	death	ICU	DKA	Diabetic Nephropathy	Hyperglycemic Hyperosmolar Coma	Diabetic Complications	HbA1c	Random Plasma Glucose	Fasting Plasma Glucose	Oxygen	CRP	PH	HCO3	Anion Gap	Osmotic Pressure	Na+	K+	Cr	eGFR	D-dimer	Procalcitonin	WBC	Neu	Lym	PLT	Troponin	NT-proBNP	CK	CKMB	Steriods	Survival days
1	74	0	3	18108.7	136	82	70				14	0	0	1	0	0	1	10.9	17.18	11.47	1	84.1	7.2	9.1	23.8	293	137.6	4.5	100.1	74.2	1.15	0.75	16.62	15.29	0.57	262	0.01	86.9	19	10	0	180
1	91	1	3	10497.4	127	86	98				16	1	0	1	0	0	1	11	28.37	6.16	1	15.3	7.37	18.5	15.9	323	147.2	3.64	163.8	38.09			9.89	7.67	0.96	243	0.06	3330	292	12	0	180
1	74	1	2	16271	138	76	78	145	40	19.02	16	0	0	1	1	0	1	14.7	33.67	7.11	0	13.7	7.34	16.4	17.9	292	128.3	3.94	136.6	45.79	0.31		6.29	4.56	1.13	200			65	17	0	180
1	77	0	14	29464.4	125	75	84				17	1	0	1	1	0	1	13.2	16.51	12.86	3	193.9	7.39	23.3	10.9	332	155.6	3.17	63.1	82.71	7.23	5.78	14.03	12.62	0.45	154	0.01	291	87	32	1	17
1	87	1	5	16771.7	154	88	100	155	65	27.06	16	0	0	1	0	0	1	8.7	11.51	5.93	0	5.5	7.45	25.4	8.1	282	137.6	3.79	65.7	95.01	0.89	0.06	3.83	2.34	1.08	162			58	13	0	180
1	83	1	2	5550.67	115	81	90				3	1	0	1	1	0	1	11.7	24.8	34.55	2	140.8	7.38	22.5	11.9	304	139.3	4.47	105.6	38.81	1.05	0.56	16.72	15.14	0.87	119	0.15		357	13	1	3
1	49	0	2	8295.14	122	76	121				8	0	0	1	0	0	1	15.3	15.75	12.98	2	201.8	7.37	19.9	13.4	323	154.6	3.05	85.8	104.66	3.58		8.88	7.6	0.3	233	0.01	1140	52	13	0	180
1	87	0	10	8245.31	171	90	113				5	1	0	0	1	1	1	9.7	17.56	29.56	3	91.6	7.4	17.4	15.2	321	146.8	4.33	206.7	19.08	1.97		9.86	8.16	0.83	175	0.07	1080	271	27	1	5
1	86	0	1	1987.41	153	80	110				1	1	0	1	0	1	1		17.05		3		7.34	19.7	21.6	411	187.5	4.02	335.9	13.51	11.02		29.95	27.34	1.55	424		476			0	1
1	50	0	9	7536.57	132	89	100	178	78	24.62	10	0	0	1	1	0	1	12.6	12.55	10.25	0	1.3	7.37	18.8	12.5	279	134.4	3.83	52.1	101.41	2.44		7.76	6.47	0.77	108		21.7	49	25	0	180
1	92	1	7	9909.32	154	78	82	158	45	18.03	4	1	0	1	0	1	1	6.2	18.34	5.21	3	14.7	7.39	22.7	12.7	368	170.9	3.22	119.6	45	5.89	0.67	10.96	10.21	0.46	200	0.64	11300	293	13	0	4
1	87	1	2	6179.37	111	67	89	152	60	25.97	2	1	0	1	1	0	1	12.2	13.58	17.21	3	15.2	7.3	15.5	13.9	313	142.1	4.24	303.8	15.75	2	1.92	16.19	15.25	0.41	173	0.19	6530	404	39	0	2
1	85	0	2	19454.7	135	85	120				7	1	0	1	0	0	1	14.9	22.51	16.94	3	201.3	7.01	7.8	15.7	308	140.9	3.49	164.3	28.44	15.03	11.42	16.52	14.11	0.59	295	0.09	6120	1644	47	0	7
1	75	1	3	7996	140	101	110				3	1	0	1	0	0	1	6.6	16.3	10.92	3	178.6	7.39	19.4	16.8	315	136.1	5.5	303.7	14.09			15.85	14.69	0.68	275	0.15	2320	458	35	0	180
1	72	0	2	7852.25	123	89	108				2	1	0	1	1	1	1	15.8	10.47	13.1	3	200	7.39	21	10.7	332	152.2	3.37	145.9	37.91	9.36	5.89	12.84	11.47	0.45	300	0.21	3200	576	15	0	2
1	53	0	3	5618.18	125	75	87				9	0	0	1	0	0	1		20.06	15.81	1	21.9			24.5	278	128.9	5.45	112.8	83.08	0.89	0.4	28.25	23.23	1.85	289			268.1	41.8	0	180
1	70	1	10	44309.8	151	101	112				42	0	0	1	0	0	1	13.8	31.2	10.63	0	4.9	7.36	20.6	29.8	292	130	5.63	85.7	142.74	1.11	0.02	26.95	24.52	1.23	460		203	61	10	1	180
1	74	0	5	20187.8	142	70	88				16	0	0	1	1	1	1	12.7	32.87	8.11	1	64	7.37	24.3	22.6	372	156.6	4.08	441.7	9.32	0.6		9.03	7.98	0.43	314	0.23	832	5022	65	0	180
1	76	1	3	17396	114	66	108	150	60	26.67	15	0	0	1	1	0	1	6.8	8.97	10.32	1	200	7.46	20.1	24.4	294	141.5	3.26	404	9.92	29.49		6.82	6.52	0.18	87	0.01	5660	557.1	23.1	0	180
1	88	1	2	17817	126	88	95				17	0	0	0	1	1	1	15.4	35.22	13.43	1	17.5	7.37	18.2	22.1	331	146.3	4.38	151	29.94	1.64	10.23	8.74	7.77	0.6	128	0.2	160.8	375.6	68.2	0	180
1	80	1	15	17817	131	88	90	150	54	24	23	1	0	0	0	0	1	10.9	25.31	10.83	0	63.6			17.5	295	134.8	4.22	66	79.03	0.38		16.31	14.34	1.11	224		600	225.9	13.3	0	180
1	91	0	7	5186.77	131	57	101	156	60	24.65	2	1	0	1	0	0	1	7.6	9.83	11.98	3	187.5	7.31	15.3	18.1	338	153.2	5.12	370	14.25	1.29		9.01	6.98	1.23	221	0.11	1630	179.1	11.9	0	2
1	75	0	7	213817	150	80	95	166	65	23.59	25	1	1	1	1	0	1	11.7	24.82	8.88	3	138.7	7.18	19.7	14.5	295	133.6	4.87	177	34.79	103.21	0.64	14.72	13.41	0.81	199	0.12		62.1	19	1	25
1	82	0	2	10154.2	125	76	130				4	1	0	0	0	0	1	12.3	26.04	7.94	3	201.5	7.47	27.6	18.2	311	140.7	4	98	67.41	8.89	2.74	12.46	11.06	0.32	229	0.09	726	266.1	26.2	0	4
1	23	0	1	8086.53	99	68	70				9	0	0	1	0	0	1	10.8	13.7	6.04	0	0.4	7.36	17.1	19.7	335	155.9	3.53	79	112.59	0.95		8.93	7.95	0.51	312		160	236	18	0	180
1	84	0	1	21386.5	107	89	112				1	1	0	1	1	0	1	12.3	21.86	15.22	3	8.9	6.84	6.4	18.3	319	138.2	4.54	300	15.71	0.65		13.82	11.44	1.33	200	0.78				0	1
1	71	0	7	19112.5	148	72	82	169	55	19.26	16	0	0	1	0	0	1	7.1	10.87	6.31	2	156.1	7.46	29	28.5	290	138.7	3.67	58	126.46	4.47		12.3	11.14	5	156	0.01		840.7	29.1	0	180
1	74	0	6	21386.5	156	103	100				10	1	0	1	0	0	1	9.1	18.22	11.28	3	103.6	7.38	22.8	23.3	371	166.3	4.11	234	68.12	8.54		10.28	8.49	0.95	311			419	17	0	10
1	48	0	5	5624.76	152	96	84	160	56	21.88	5	0	0	1	0	0	1	13.7	34.29	2.97	0	23.1	7.27	12.9	26.7	308	135.5	3.85	100	73.62	1.19		19.31	15.39	1.93	352		996	479.6	20.7	0	180
1	85	0	2	2105.53	170	72	97				1	1	0	1	0	0	1		15.56		2		7.37	18.5	15.2	283	131.5	4.6	182.2	28.51			6.46	4.5	0.7	170			319.1	10.3	0	1
1	75	0	10	130805	145	90	105	165	60	22.04	9	1	1	1	0	0	1	9.5	17.94	8.28	4	487.29	7.42	21.9	39.3	334	143.9	6.68	335	14.64	17.31	21.75	6.58	6.19	0.29	122	0.04	1790	342.7	24.5	1	9
1	83	1	5	22436.7	113	57	93				22	1	0	1	1	0	1			7.19	3	112.06	7.26	12.3			139	3.53	505.4		1.38	1.59	13.79	13.06	0.31	261	29.2	273	383	19	1	22
1	99	0	11	33703.8	124	82	112				22	0	0	0	1	1	1	10.9	13.7	6.55	3	78.5	7.44	27.7	14.1	377	171.2	3.73	215	26.27	1.2	0.15	12.91	11.16	0.78	125	1838		394.8	16.3	0	180
1	73	0	10	44575.3	158	88	72				36	0	0	0	0	0	0	10.3	19.85	12.73	1	145.6	7.44	26	9.9	295	137.8	3.21	59	123.59	16.68	0.07	15.04	12.81	0.82	268		578	178.9	17.7	0	180
1	81	1	10	14780.4	132	72	70	150	52	23.11	15	0	0	0	1	0	1	12	14	5.52	1	24.2			10.8	275	137.1	3.83	91	54.66			9.94	6.92	1.79	329	0.01		34	11	0	180
1	63	1	7	8099.25	141	77	74	150	48	21.33	9	0	0	0	0	0	1	9.2	23.48	14.75	0	24.8			12.2	293	141.1	4.01	68	80.47	0.28		3.67	2.23	1.06	85	0		67	13	0	180
1	95	1	1	18082.3	230	78	122				16	0	0	0	1	0	1	6.3	3.1		2	157.9	7.46	24.1	6.7	283	142.2	4.77	75.5	40.1	3.87		7.83	6.55	0.54	332	4.46	35000	3353	59	0	180
1	77	1	7	7665.33	166	52	68	158	64	25.64	15	0	0	0	1	0	1	9.4	31.94	29.1	1	1.3	7.41	19.1	15.1	317	138.4	5.1	184	24.54	1.27	0.15	6.73	3.67	5.28	211	0.01	165	24	12	1	180
1	54	0	7	9289.66	153	96	101	173	76	25.39	11	0	0	0	1	0	1	7.9	26.31	12.17	0	51.6			7.5	291	132.5	4.44	122	57.07			7.19	5.13	1.23	447	0.01	1240	69	19	0	180
1	64	0	20	6752.98	125	85	103	175	60	19.59	2	1	0	0	1	0	1	7.7	4.69	12.06	3	89.82	7.42	22.1	7.4	291	138.8	4.35	133.6	50.08	4.78		6.6	5.35	0.84	214	6.48	1158.4	378	38	0	2
1	65	0	7	14057.3	120	80	80	173	68	22.72	9	0	0	0	0	0	0	6.3	6.26	5.26	1	82	7.46	26.4	10.3	273	135.4	3.77	78	92.38	0.41	0.22	4.57	2.62	1.03	161	0.01	112	333.2	10.7	1	180
1	37	0	5	13040.6	122	91	106	178	78	24.62	6	0	0	0	0	0	0		18.18	13.41	2	47.5	7.49	28.7	10.3	284	136.2	3.21	50.6	109.28	0.44	0.05	3.84	2.11	1.36	175			54.1	7.4	0	180
1	63	0	1	8114.91	110	81	97				3	0	0	0	0	0	0	5.3	6.6	5.17	1	155.2	7.47	25.1	10	284	140	3.42	112	60.88	0.68	3.1	7.17	5.89	0.74	181	14.2	10200	640.2	34.5	0	180
1	58	0	7	12790.9	134	95	108	185	110	32.14	6	0	0	0	0	0	0		7.89	5.81	2	113.3	7.36	25.5	15.1	277	138	3.39	85	85.51	0.28	0.06	7.24	4.27	1.67	245	0.01	23.9	254	12	0	180
1	68	0	9	12075.1	137	88	77	165	55	20.2	6	0	0	0	0	0	0		17.65	6.7	2	105.3	7.45	25.6	9.2	289	137.3	3.59	93	74.66	0.26	0.08	6.25	4.36	0.87	285			52	9	0	180
1	77	0	1	12544.2	127	84	119	162	58	22.1	13	0	0	0	0	0	0	5.7	11.64	6.92	4	150	7.53	22.4	11.8	269	130.4	4.18	136	46.79	9.65	1.91	11.26	10.05	0.88	472		433	144.8	7.1	1	180
1	68	0	14	11558.7	132	84	84	160	61.5	24.02	5	0	0	0	0	0	0	8.4	10.91	7.17	2	32.1	7.46	26.6	9.1	281	138	3.8	60	123.25	0.23	0.03	7.17	5.27	1.19	277			79	7	0	180
1	83	0	10	2030.88	87	54	70	160	61	23.83	6	0	0	0	0	0	0		17.01		1	66.2	7.44	21.9	6.3	286	130.8	4.12	106	55.65		0.15	6.66	5.18	1.01	131	0.01	624	25.1	11.5	1	180
1	83	1	7	10813.8	127	69	68	155	69	28.72	4	1	0	0	1	0	1		22.27	15.92	4	168.1	7.46	21.4	11	288	135.4	4.12	158	28.74	0.78	0.31	8.4	6.91	0.94	206	0.03	6750	167.1	22.8	1	4
1	66	0	10	10884.5	120	81	87	178	90	28.41	8	0	0	0	1	0	1		7.41	4.87	0	44.6	7.46	24.1	9.6	276	133.8	3.72	159	40.32	0.73	0.41	3.48	2.03	0.96	96			647	22	0	180
1	80	0	4	7155.75	137	82	86	164	75	27.89	6	0	0	0	1	0	1	7.3	12.18		0	200	7.39	22.6	12	279	134.4	3.38	125.1	46.52	3.49	0.18	14.63	12.74	0.79	253			95.6		0	180
1	76	0	7	12587.7	180	93	76	168	62	21.97	9	0	0	0	0	0	0		11.39	7.04	1	68	7.41	24.8	14.3	282	137.4	3.57	70	101.36	0.65	0.12	3.97	2.78	0.59	193			360.3	20.8	0	180
1	56	1	5	18000.4	103	87	82				8	0	0	0	0	0	0		11.82	10.73	1	6.5	7.45	20.1	12.4	255	124.2	4.03	63	90.51	1.91		13.3	10.45	1.78	217	0.44		283	42	0	180
1	73	0	10	8976.66	140	81	92	168	71	25.16	9	0	0	0	0	0	0	7.3		9.08	1	51.7	7.46	23.2	14.7	272	133.8	3.54	98	69.02			4.56	3.39	0.52	282			782	21	0	180
1	54	0	10	11578.5	120	78	80	170	61	21.1	11	0	0	0	0	0	0		18.53	10.42	2	80	7.48	25.8	10.3	274	129	3.85	59	131.39	0.8	0.17	6.12	70.9	1.23	146			38	26	0	180
1	56	0	2	12300.5	118	77	77	161	78	30.09	4	0	0	0	1	0	1		6.35	7.29	1	200			20	313	141.1	4.51	2023	2.22		8.43	6.88	5.78	0.38	115			484	25	0	180
1	88	0	4	22304.3	119	63	89	160	65	25.39	3	1	0	0	0	0	0	7.6	7.45	9.14	3	187.2	7.5	24.4	8.2	267	131.1	3.74	85	78.57	27.48	0.09	5.86	5.05	0.48	123	0.05	3260	361	23	1	3
1	60	0	1	26558	115	69	78				4	0	0	0	0	0	0	6.6	7.12	4.98	1	173.3	7.41	22.5	9.3	274	135.4	3.99	68	109.53		15.86	25.4	22.42	1.88	218	0.01		167	13	0	180
1	88	1	10	1593.61	131	74	70				1	1	0	0	0	0	0		12.71		1		7.27	20.3	11.8	290	139.1	3.21	101.2	42.83	1.7		8.54	6.22	1.75	152	0.07		43.4	22.6	0	1
1	73	0	10	97330.9	143	78	69	174	63	20.81	30	0	1	0	0	0	0	8.1	16.4	16.71	4	70.9	7.45	28.8	8.2	300	142.4	3.5	93	73.59	48.43		7.41	6.88	0.4	96	1.19		326	16.1	1	180
1	87	1	10	35968.1	133	61	91	159	64	25.32	13	1	0	0	1	0	1	10	12.2	28.43	4	123.3	7.44	22.5	15.3	314	134.8	5.45	325	12.39	24.17	0.47	9.59	8.37	0.76	227	0.05	176.7	44	27.1	1	13
1	80	0	14	67847.4	125	70	93	175	79.5	25.96	17	1	1	0	0	0	0	7.2	13.11	12.47	3	165.6	7.44	26.8	9.6	274	133.4	3.72	52	140.48	18.76	0.07	13.04	12.18	0.26	200	0.14	1920	80.2	11.9	1	17
1	74	1	3	7644.7	93	57	66				8	0	0	0	0	0	0	7.7	6.79	8.62	1	0.5	7.36	25.3	11.2	284	141.9	3	86	59.67	0.31	0.16	6.73	3.66	1.91	101	0.01		48.5	19.1	1	180
1	98	0	11	32061.9	160	86	105				14	0	0	0	1	0	1	8.7	11.38	20.92	0	107.1	7.48	22.8	10.9	322	156.8	3.68	123	50.15	1.75		8.64	7.78	0.51	234	0.06	436	653.9	14.8	1	180
1	89	0	7	8545.61	144	80	91				4	1	0	0	0	0	0	6.5	6.44	7.36	4	34.9	7.44	22	14.8	276	135.6	3.98	98	66.3	7.61	0.49	5.52	4.57	0.5	120	0.05	71.3	2291.1	14.3	1	4
1	90	0	14	11667.8	152	62	106				9	1	0	0	1	0	1		5.96	5.62	3	200	7.38	18.4	15.8	334	153.4	4.55	382	13.79	17.55	8.53	9.35	7.88	0.64	257	0.41	1770	862.6	16.5	0	9
1	88	0	3	9030.84	121	84	77				8	0	0	0	1	0	1	6.7	8.32	8.57	1		7.25	19.2	15.6	284	137.9	4.19	210	27.56	0.62	16.45	12.52	10.48	1.16	214	0.06	1050	529.6	29.9	1	180
1	83	0	10	10184	152	63	88	170	62.5	21.63	8	0	0	0	1	0	1	6.1	8.35	6.22	1	84.2	7.31	13.1	11.9	292	135.7	3.74	308.1	17.24	1.24	0.34	6.55	5.08	0.76	280	0.05	2740	125.4	24.9	0	180
1	74	1	3	24203.5	120	70	108	156	60	24.65	15	0	0	0	1	0	1	7.4	11.54	12.15	4	133.1	7.36	16.8	12.6	285	135.1	2.83	184	24.74	0.44		6.45	4.4	1.11	180			252	19	1	180
1	57	0	14	67672.7	162	127	94	185	108	31.56	7	0	0	0	0	0	0	7	10.35	6.27	1	24.7	7.48	28.6	9	288	141	3.65	90	80.01	1.01		6.95	4.74	1.57	308	0.28		74	11	0	180
1	88	1	4	14171.8	171	84	56				8	1	0	0	0	0	0	6.9	8.4	9.52	1	5.4	7.39	23.2	8.6	280	135.1	3.64	144	31.65	3	0.05	8.12	5.01	2.11	302	0.53	2380	65	12	0	180
1	70	0	7	10650	157	87	85	170	75	25.95	11	0	0	0	0	0	0	8.3	15.96	8.17	1	6.9	7.42	23.9	11.9	291	141.9	4.16	95	72.62	0.4		4.97	3.09	1.24	173	0.04		77	11	0	180
1	75	0	7	25443.2	134	74	91				15	1	0	0	1	0	1	7.3	12.09	10.56	4	122.3	7.37	17.8	16.7	308	143.5	4.73	251	23.21	54.54	0.13	8.77	7.69	0.65	176		6210	351.3	26.8	1	180
1	76	0	2	113470	136	60	100				19	1	1	0	0	0	0	9.9	11.04	20.15	3	90.5	7.46	12.4	15.5	295	138.6	4.26	158.5	35.94	2.57	1.38	7.31	5.74	0.86	160	0.11				1	19
1	88	0	1	126069	108	85	120				24	1	1	0	1	0	1	6.9	16.6	17.75	4	182.3	7.44	22.6	14.3	318	149.4	3.84	204	28.52	2.32	0.34	6.41	5.85	0.43	188	0.16	849	339	23	1	24
1	82	1	11	22093.5	121	65	80				13	0	0	0	0	0	0		10.35	17.7	2	31.9	7.4	23	10.8	281	131.8	4.13	72	71.95	0.98	0.02	9.96	7.64	1.25	260	0		36	11	1	180
1	82	0	2	17016.4	188	139	136				24	0	0	0	1	0	1		8.8	9.64	3	188.2	7.34	27.2	11.1	280	134.5	3.65	109	59.88	1.88	58.94	12.35	11.4	0.5	120	0.1		783.9	9.1	1	180
1	85	0	7	39144.6	108	65	72				15	0	0	0	1	0	1		9.64	10.57	2	93.6	7.41	20.9	11.2	277	130.8	4.88	196	30.07	0.95	0.08	6.89	4.47	1.43	152	0.02		140.1	10.1	1	180
1	85	1	21	16670.3	107	62	89	168	74	26.22	9	0	0	0	0	0	0		10.07	7.46	2	2.2	7.41	24.4	15.3	294	143.2	3.42	51	110.89	0.48	0.03	7.05	4.32	1.97	264	0.01	17.6	63.2	12.9	1	180
1	67	0	14	12260.3	138	100	86	173	68	22.72	12	0	0	0	0	0	0		10.89	11.42	3	86.6	7.33	19	9	280	137.4	3.78	71	102.48	0.94	0.06	3.17	2.02	0.72	124	0.01		222.8	11.4	1	180
1	60	1	14	12260.3	120	80	80	160	57	22.27	8	0	0	0	0	0	0	7.1	6.1	6.32	1	12.7	7.47	25.3	13.7	280	139.2	3.46	77	70.59	0.36	0.05	7.4	5.51	1	177			67	5	1	180
1	79	0	2	20184.1	135	76	92				14	0	0	0	0	0	0	14.2	17.06	19.95	2	73.9	7.42	23.4	11.3	281	134.3	3.44	73	94.99	0.39	0.39	6.16	4.51	0.96	225			60.6	5	1	180
1	70	1	30	45387.5	126	92	100	160	75	29.3	26	0	0	0	0	0	0		10.45	9.86	3	174.2	7.46	25.1	15.3	270	131.3	3.82	76	69.33	1.65	0.26	12.75	9.23	1.72	807			20	2.7	1	180
1	67	0	7	29712	145	83	89				17	0	0	0	0	0	0	7	5.68	5.97	2	153.4	7.44	24.4	9.1	238	118.1	3.69	50	151.54	1.28	0.09	10.2	8.38	0.54	462			108.5	21.8	1	180
1	84	1	20	54927	138	89	69	153	46	19.65	20	1	0	0	1	0	1		11.87	18.72	3	26.3	7.43	19.9	10.8	323	156.9	3.09	128	36.57	11.5	0.34	11.28	9.98	0.52	168			227.9	43.5	1	180
1	42	0	20	30926.1	124	81	128	175	53	17.31	15	0	0	0	0	0	0	11.8	20.74	18.25	2	136.6	7.49	27.5	9.7	277	129.1	4.37	87	89.15	1.98	1.36	4.43	3.1	0.59	234			249	15	1	180
1	67	1	9	15586.9	117	76	109	155	55	22.89	11	0	0	0	0	0	0	6	10.17	9.43	2	43.2	7.45	25.5	14.1	291	144.2	4.74	63	87.27	1.05	0.06	4.52	3.41	0.74	112			37	12	1	180
1	72	0	20	18744.4	108	82	92				12	1	0	0	1	0	1	7.2	13.25	9.25	2	192	7.37	24.2	12.4	281	134	3.72	147	43.5	1.92	0.39	10.94	8.59	1.15	459	0.02		184.7	9.7	1	180
1	73	1	21	18580.7	176	98	98	161	59	22.76	11	0	0	0	0	0	0		6.76	7.83	2	38.5	7.33	22.1	12.5	283	1411.3	4.29	68	78.1	0.62	0.07	9.14	4.95	3.02	430	0		53.9	9.2	0	180
1	90	1	4		142	57	72				10	1	0	0	1	0	1	9.2	14.92	11.04	1		7.38	19.3	15.8	309	138.9	4.45	179	24.59	4.57	68.56	7.26	6.03	0.77	269	0.05	4690	137.6	13.7	0	180
1	82	0	3	8758.98	153	61	80				9	0	0	0	0	0	0		8.43	8.14	1	129.7			9.9	271	133.2	3.9	107	61.02		0.55	14.19	12.2	0.82	134			201.2	12.5	0	180
1	88	1	5	11584.5	132	88	50				10	1	0	0	0	0	0	6.3	5.85	5.05	1		7.44	24	10.7	285	141	3.41	51	104.28	2.12	0.05	3.3	1.7	1.12	153	0.01	54.6	173	10	0	180
1	89	1	4	11584.5	138	83	95	145	54	25.68	7	0	0	0	0	0	0	6.9	9.42		3		7.5	26.7	6.6	274	135.1	2.61	62	76.9	0.69		6.19	5.13	0.54	120	0.01		139.8	20.5	1	180
1	85	0	3	7326	165	85	93	163	48	18.07	5	0	0	0	0	0	0	6.8	11.15	6.42	1		7.39	30.4	5.6	293	140.9	4.21	79	86.35	1.75	0.05	8.03	6.37	0.78	162	0.03	38.8	73	16	1	180
1	59	0	4	25031.9	136	80	76	165	74	27.18	10	0	0	0	1	0	1		13.84	7.75	1	57			7.7	285	134.5	4.52	204	30.93	3.21	0.37	8.96	6.95	1.04	211	0.73		539.7	29.1	0	180
1	61	0	2	17723	166	111	94				16	0	0	0	0	0	0		16.3	17.76	1	200			8.4	273	130.1	4.38	83	86.72		5.03	14.82	13.83	0.35	223			206.8	9.9	0	180
1	67	1	14	8136.72	117	65	84	158	71	28.44	9	0	0	0	0	0	0			6.66	1	8.7			11.6	284	141.7	3.41	64	85.87		0.03	4.78	2.78	1.32	272			177	16	0	180
1	74	0	15	9960.12	101	68	72	166	76	27.58	6	0	0	0	1	0	1	8.3	9.22	10.19	1	26.8	7.46	28.1	9.3	289	141.5	4.4	169	36.79	3.48	0.03	7.03	5	1.15	243	0.02	2590	154	14	0	180
1	77	1	2	13373.9	135	69	80	148	48	21.91	11	1	0	0	0	1	1	11.5	33.98	8.47	1		7.32	18.1	11.3	284	144.1	3.39	74	67.55	1.03		16.53	14.01	1.36	271	0.01	94.5	91.2	12.5	0	180
1	59	0	3	16205.6	121	85	90				7	0	0	0	1	0	1	7.2	17.24	8.43	1		7.49	26.6	15.6	259	119.9	2.48	269	23.79	0.59	0.73	10.09	9.58	0.16	142	0.03		14	19	1	180
1	86	0	7	10519.1	133	75	92				5	1	0	0	0	0	0		17.37	9.6	3	150.7			379	18	137.7	3.34	86	78		0.23	9	6.16	1.8	229			379	18	1	5
1	81	0	8	12094.4	132	62	84				7	0	0	0	0	0	0	7.1	15.38	7.95	1		7.43	21.1	11.2	283	133.9	3.88	93	72.05	0.63	0.15	4.1	2.88	0.76	140	0.01		98	11	0	180
1	90	1	7	16680.2	95	64	102				11	1	0	0	1	0	1	7.5	12.43	13.7	1		7.38	14.4	16.5	307	143.7	4.53	293	13.91	2.29	0.29	13.22	11.15	1	284	0.07		48	17	0	180
1	91	0	15	11389	161	62	95				9	0	0	0	0	0	0		5.47	7.01	1	143.5			14.2	260	128.1	3.11	81	81.96		0.2	9.8	7.93	0.87	421			25	12	0	180
1	64	0	10	12549.8	131	67	104	170	72	24.91	8	0	0	0	1	0	1		20	17.38	1	32	7.4	22	14.8	298	139.5	4.54	141	46.48		0.05	11.39	10.22	0.48	277			104	13	1	180
1	86	0	7	11896.3	118	83	84	165	55	20.2	9	0	0	0	0	0	0	6.9	8.73	7.93	3		7.38	23.6	13.4	351	159.8	4.41	207	28.23	7.13	0.18	8.08	6.82	0.73	292	0.12	725	107	13	0	180
1	68	0	90		129	88	113				6	1	0	0	0	0	0	5.1	11.84	6.27	1	200	7.44	26.2	8.5	300	143.5	3.51	88	78.98	1.64	0.33	13.61	12.07	0.5	597	0.01	265	38	12	0	180
1	83	0	10		138	67	80	165	45	16.53	10	0	0	0	0	0	0			9.76	1	21.9			10.2	284	138.3	3.96	62	114.47	1.59	0.08	14.73	12.52	0.76	542			194	12	0	180
1	94	0	1	20792.2	137	72	86				8	0	1	0	0	0	0	7.2	11.64	9.69	3	2.41	7.4	27.7	11.5	281	135.1	4.12	86.4	65.56	0.95	312.51	5.25	4.97	0.21	118	0.01	450	101	9	1	180
1	67	0	7		111	70	74				18	0	0	0	0	0	0	7.8	12.53	8.63	1	2.8	7.41	31.4	14.6	282	139.5	3.18	42	184.79	0.37	0.12	11.28	8.95	1.6	543	0.02		52	12	0	180
1	83	0	5	6260.61	142	80	79				5	0	0	0	0	0	0	7.5	9.97	7.2	0		7.43	25.7	9.7	286	139.8	3.61	90	74.13	0.45	0.04	6.25	3.6	1.67	253	0.01	32.8	120	23	1	180
1	62	0	14	4072.41	134	73	102	161	70	27.01	8	0	0	0	0	0	0	7.3	8.35	9.2	1	19.9	7.37	27.8	6.6	274	136	4.22	75	97.08	0.26	0.06	6.08	3.47	1.73	156	0.01	105	249	24	1	180
1	77	0	14	7733.69	101	56	81	173	70	23.39	8	0	0	0	0	0	0		8.25	7.32	1	88.1			11.7	292	143.9	3.17	84	81.71		0.04	8.47	7.25	0.65	167	0.02		59	11	0	180
1	68	1	7	12428.3	140	70	78	150	48	21.33	3	0	0	0	0	0	0	6.9	11.21	5.46	0	11.5	7.45	24.9	9	282	137.5	4	77	68.82	1.32	0.07	7.59	5.6	1.25	377	0.01	583	108	59	0	180
1	80	0	4	12445.4	150	85	85	165	90	33.06	13	0	0	0	0	0	0		9.63		1	177.6	7.46	25.3	8.8	278	136.1	3.71	62	89.06		0.57	3.58	1.86	0.84	87			161.4	10.5	0	180
1	69	0	15	13848.7	174	84	80	165	55	20.2	10	0	0	0	0	0	0	6.8	12.49	4.37	1	60.6	7.36	17.6	11.9	301	130.8	3.6	902	5.4	3.25	1.18	5.99	4.68	0.59	354	0.03	12100	179	16	1	180
1	90	1	14	25259.7	119	59	102				8	1	0	0	1	0	1		11.11	14.31	1	104.7	7.2	11	13.7	318	144.2	4.49	174	25.32	19.24	0.41	14.19	12.11	0.92	255		9930	165	17	0	180
1	78	0	2	16099.3	154	83	95				14	0	0	0	0	0	0		9.92	8.29	1		7.44	27.4	8.9	286	139.1	3.61	63	114.04	4.89	0.03	6.96	5.22	1.03	300	0.01		26	18	0	180
1	59	0	13	54027.6	105	59	59	167	60.8	21.8007	23	0	0	0	0	0	0	7.3			0	64.76	7.3	18.1			137	5.01	201.3		1.96	0.272	9.73	8.84	0.3	37510	233.6	56	122	9	1	180
1	66	0	30	35645.3	117	62	81	180	70.2	21.6667	6	0	0	0	0	0	0	8.1			0						137	4.75	106.2		1.31		12.55	11.09	0.55	12410	20.2	186	62	15	1	180
1	62	0	7	51675.6	162	91	83	170	57.8	20	13	1	0	0	0	0	0	6.8		4.43	0	5.49					142	4.27	340		1.13	0.376	4.83	3.85	0.44	112	158.3	1627			1	180
1	54	1	21	46503.2	120	76	90	150	69	30.6667	21	0	0	0	0	0	0	6.5		9.52	0		7.4	18.5			139	4.51	157.8		0.45	0.06	4.75	4.04	0.45	226	20.3	81	311	22	1	180
1	45	0	20	23337.8	160	110	80				8	0	0	0	1	0	1			13.89	0	107.37	7.5	22.1			137	3.4	348.8		0.44	1.63	9.16	8.05	0.72	243	24.9	47	38	8	1	180
1	60	0	20	20960.5	110	65	76	173	80	26.7299	10	0	0	0	0	0	0			6.79	0	114					130	4.22	313		0.73	1.07	3.85	2.85	0.38	143	27.1	76			1	180
1	57	1	28	34063	140	85	80	155	36.5	15.1925	18	0	0	0	1	0	1			9.11	0	27.41					146	3	216		0.82	0.62	7.33	6.3	0.52	127	14.8	83	60	43	1	180
1	44	0	1	9936.05	94	68	103	160	45	17.5781	16	0	0	0	0	0	0	6.9	11.1		0	66.47	7.45	20.1			141	4.3	113.8		1.22	0.542	11.72	11.32	0.15	163	8.7	18	25	19	1	180
1	63	0	2	5359.86	119	64	70	173	70	23.3887	15	0	0	0	0	0	0	6.7	4.49		0	121.69	7.27	24.9			138	3.9	58.4		1.49		16.11	13.92	1.071	273		82	45	19	0	180
1	58	0	10	27042.5	128	84	75	163	65	24.4646	11	0	0	0	0	0	0	8.4	12.45	14.75	0	32.78	7.4	19							1.48	0.16	6.66	5.61	0.511	167	38.6	611	65	12	1	180
1	41	1	22	30362.3	125	80	75	157	55.5	22.5161	15	0	0	0	0	0	0		10.61	7.89	1	24.2					135	3.9	167		0.5	0.567	6.88	5.86	0.131	164	7.9	495	42	13	1	180
1	89	1	12	25587.7	143	78	76				15	0	0	0	0	0	0	9.3	17.29	16.22	1		7.35	18.7			143	3.8	66.1		1.59	0.082	8.54	6.91	1.22	177	6.5	66	29	15	0	180
1	53	0	14	55993.7	125	85	80	164	64.5	23.9813	23	0	0	0	0	0	0		17.67	12.62	1	10.59	7.39	18.8			130	3.47	105		0.81	0.344	33.79	31.49	0.72	92	11.8	61			1	180
1	73	0	40	8689.24	143	73	84	170	60	20.7612	5	0	0	0	0	0	0	6.8	5.56		1	4.4					138	4.13	108.3		0.23	0.062	4.34	2.64	1.04	374	4	18	62	10	0	180
1	49	0	7	20732.3	131	86	88	167	72.5	25.9959	8	0	0	0	0	0	0	7.5	9.73	9.73	3	46.01	7.31	19.6			135	4.02	98.2		0.2	0.122	15.65	14.01	0.5	96	19.7	10	166	10	1	180
1	45	1	10	133391	144	75	70	145	45	21.4031	19	1	0	0	0	0	0	6	12.89	12.56	3		7.4	15.7			134	4.11	181.3		0.23	0.883	11.99	11.16	0.13	197	3.9	870	26	6	1	19
1	58	1	15	9278.09	140	82	83	160	64	25	8	0	0	0	0	0	0	6.8	4.65	4.5	1	1.86	7.34	23.5			142	4	53.1		0.35	0.085	14.56	10.93	2.62	411	1.9	35			1	180
1	80	1	2	28017.4	148	72	98				11	1	0	0	1	0	1	7.3	5.18	6.97	3	142.8					128.4	5.07	843	4.2	12.38	25.11	11.23	10.48	0.35	85	0.2	12400	55	38	1	11
1	59	0	23	22226.6	121	74	72	156	60	24.6548	9	1	0	0	0	0	0	6.9	8.89	11.28	2	11.54	7.3	16.4			137	3.9	270.4			0.162	5.73	5.28	0.16	178	36.2	88	151	17	1	180
1	30	0	14	20338.2	128	83	72	172	75	25.3515	7	0	0	0	0	0	0		7.98	7.31	3		7.4	22.1			134	3.4	112		0.46		5.18	4.26	0.65	219	2.5	19	26	23	1	180
1	59	0	14	17158	167	99	75	175	81.5	26.6122	8	0	0	0	0	0	0			9.57	3		7.35	20.3			133	3.51	118.4		0.34	0.046	9.1	8.21	0.59	216	3	153	40	16	1	180
1	67	0	18	23335.9	145	90	65				19	0	0	0	0	0	0	9.6	12.16	11.1	1		7.41	23.4			136	4.5	85.9		0.7	0.073	11.52	10.46	0.57	234	13.9	297	47	10	1	180
1	58	0	14	22754.6	145	85	70	168	65	23.03	15	0	0	0	0	0	0	7.4	11.87	9.45	1	29.75	7.43	17.9			135	3.82	79.2		1.3	0.074	10.88	9.79	0.66	137	10.3	147	100	26	1	180
1	77	1	43	151353	86	99	86				32	1	1	0	0	0	0	5.8	4.99	11.24	4	75.7	7.4	21			147.8	3.68	40.6		6.4	0.19	13.07	11.61	0.91	95	0.04	2730	375	16	1	32
1	39	1	4	26514.7	96	61	95	160	35	13.6719	10	1	0	0	0	0	0				0						126	4.8	30.3			0.712	9.39	6.19	2.37	258					0	10
1	59	0	3	40123.9	180	88	104				10	0	0	0	0	0	1	7.6	10.94	17.26	1	86.8	7.46	27.4			141.9	3.76	82.2		0.9		9.06	7.1	1.36	202	0.003	15.6	177.5	8.5	1	180
1	86	0	3	136559	138	74	78				11	0	0	0	0	0	0	9.3	8.99	7.94	2	14.35	7.4	20.3			137	4.6	137.7		2.37	0.149	10.66	9.21	0.99	226	15.4	71			1	180
1	73	0	7	15873.7	138	75	69	172	70	23.6614	13	0	0	0	0	0	0	6.9		8.27	2	86.5	7.34	19.6			140	4.57	83.6		0.97	0.073	4.79	3.78	0.64	238	3.7	31	57	9	1	180
1	71	1	9	27211.1	158	104	98	154	60	25.2994	23	0	0	0	0	0	0	7.3		7.42	1	0.8	7.31	20			142	3.58	71.1		0.43	0.041	13.51	11.41	1.44	324	4.5	29	64	38	1	180
1	63	0	10	20623.3	128	78	70	176	60	19.3698	14	0	0	0	0	0	0		13.31	4.85	1		7.43	26.8			138	3.85	66.8		0.41	0.204	4.14	3.87	0.18	50	4.7	62	39	22	1	180
1	77	0	12	51638.8	116	68	78				27	0	0	0	1	0	1	7.7	7.27	13.61	3	18.75	7.38	19.3			137	4.4	229.6			0.16	4.6	3.35	0.77	122	38.2		94	3	1	180
1	59	0	10	11299.1	137	90	76	165	64	23.5078	6	0	0	0	0	0	0	7.4		14.46	0	13.12					137	4.8	111.1		0.3	0.111	7.24	6.86	0.24	241	2.9	59	34	12	1	180
1	52	0	22	38039.4	124	78	98	166	58.5	21.2295	15	0	0	0	0	0	1	9.1	28.83	3.72	2	13.03	7.34	15.7			134	5.6	236.1		0.62	0.276	2.87	2.37	0.33	168	11.3	46			1	180
1	68	0	12	95713.7	139	74	81	170	82	28.3737	4	0	0	0	0	0	0	6.4	6.21	8.66	3	74.77	7.37	16.8			133	4.6	125.3		0.58	0.547	5.92	4.91	0.71	148	8.6	28			1	180
1	55	0	6	37173.6	129	67	123	160	61.5	24.0234	16	0	0	0	0	0	0			16.03	3		7.33	16.9			138	4.42	129.6			0.114	8.66	7.32	0.6	277	43.2	58	101	27	1	180
1	91	1	7		168	72	57				27	1	0	0	0	0	1	7.8		5.38	4	14.1	7.36	24.9			139	139	4.08			0.014	6.77	6.01	0.47	169	9.4	180	26	13	1	27
1	60	0	10	17939.1	153	93	60	175	75	24.4898	10	0	0	0	0	0	0	8	4.09	11.91	1		7.4	18.8			132	3.52	127.5				7.6	6.87	0.41	115	24.7	56	171	17	1	180
1	76	0	7	7563.83	173	92	67				6	0	0	0	0	0	0		12.58		1		7.36	18.9			136	3.35	75.4		0.81	0.013	14.14	13.32	0.19	241	7.2	51			0	180
1	79	0	8	20313	166	103	85				16	0	0	0	0	0	0	12.4	34.77	6.06	1	72.4	7.29	19.2			129	5.8	154.4		0.36	0.326	13.07	11.49	0.24	223	61.7	114	61	18	0	180
1	60	1	8	4602.51	118	75	68	169	87.5	30.6362	4	0	0	0	0	0	0	8.5	10.91		1						137	4.13	67.3		0.11		6.96	4.24	1.95	216					0	180
1	59	1	15	19680.3	157	79	84	150	65	28.8889	17	0	0	0	0	0	1	6.2	16.29	9.06	1	43.3	7.33	18.3		307	140.6	4.07	624	6.32	1.55	0.25	8.98	7.33	0.96	367		379.1	184	11	0	180
1	78	0	8	37339.1	164	80	106				24	0	0	0	1	0	1	10.2	21.93	8.7	2	14.68	7.34	16.2			146	4.8	188		8.15		16.7	15.29	0.47	463	18.7	94	60	14	0	180
1	84	0	13	18347.7	182	86	86				10	1	0	0	1	0	1	7	13.91	8.66	2	186.4	7.3	11.1		316	142.3	5.52	355.3		1.44	0.924	17.71	16.34	0.65	401	0.07	1100	33	10	0	180
1	89	0	4	15202.4	95	44	86				10	0	0	0	0	0	0		14.7	9.1	3	125.5	7.33	15.7		348	151.3	4.67	423.4		1.38	0.58	10.24	9.91	0.22	198	0.03	184	152	37	1	180
1	52	0	7	68947.2	132	88	104	174	87	28.7356	30	0	0	0	0	0	0	12.8		12.72	2	164.9	7.3	22.9		278	134.3	3.81	80.6		4.41	0.676	8.97	7.33	0.72	352	0.04	387	24.6	9.3	1	180
1	63	0	4	11760.5	144	86	75	154	60	25.2994	9	0	0	0	0	0	0	6.3	6	5.47	1		7.48	23.1			115	2.48	46.6		0.59	0.08	5.84	4.53	0.71	136	5.3	45.32	587	24	0	180
1	79	0	10	13430.5	146	71	89				10	0	0	0	0	0	0	8.8	11.27	7.59	3		7.26	23.5			135	4.5	94.8		0.46		7.17	5.77	0.66	206	17.8	365			0	180
1	45	0	2	33673.6	97	70	114				10	0	0	0	0	0	0		22.65	16.75	4	183.05	7.41	18.5			150	2.8	65		0.71	0.623	11.99	11.3	0.35	176	6.6	49	375	17	0	180
1	75	0	12	45934.6	190	74	96				5	1	0	0	1	0	1	8.9		11.09	4		7.27	15.3			135	5.9	1326.1		3.53	24.89	10.01	9.22	0.36	152	110.1	162	223	151	0	5
1	90	0	30	53488.8	147	89	70				27	0	0	0	0	0	0	7.5	9.47		3	9.3	7.42	18.5			129	3.4	138.7		1.4	0.853	14.43	13.27	0.23	100	49.2	215			1	180
1	69	0	12	31080.6	166	85	140				4	1	1	0	0	0	0	7.3		15.06	4	288.8	7.27	16.7			132	3.92	98.3		1.36	4.87	29.76	0.39	0.17	88	16.5	116	54	10	1	4
1	83	0	14	13252.2	142	81	85				9	0	0	0	0	0	0	5.9			1								99.8		3.74		7.21	4.38	1.57	0.15	31.3				0	180
1	85	0	11	11739.7	130	77	95				3	1	0	0	0	0	0	8.2	24.27	8.67	3		7.44	24.3	18.63	320	151.4	3.3	306	15.23	4.38	40.77	12.73	11.5	0.59	163	0.16	288	932	9.1	1	3
1	87	0	7	19168.6	188	87	75				9	0	0	0	0	0	0	7.4	7.85	9.24	1	141.5	7.453	24.8	10.8	288	141.2	4.14	82		2.36	0.085	8.41	7.21	0.83	327		144.8	61	18	1	180
1	76	1	12	18951.8	158	81	83	152	60	25.9695	8	1	0	0	0	0	0	6.6	8.63	9.23	3	10.43	7.32	17			138	4.2	80.8		2.76	0.053	24.49	2.32	16.47	95	11.7	713	26	15	1	8
1	78	0	7	52913	144	104	82				28	0	1	0	0	0	0	6.6	7.71	6.22	4	24	7.47	26.6	9.8	273	134.1	4.39	151	41.36	3.89		7.58	6.39	0.45	204	0.01	1910	361.1	8.4	0	180
1	90	0	6	11443.8	138	82	84				8	0	0	0	0	0	0	6.6	5.82	5.43	1	77	7.47	25.7	10.4	275	136.8	3.56	67	102.41	1.03		4.33	3.4	0.57	210	0.02	56.9	765	23.8	0	180
1	88	1	60	13591.1	134	61	72	155	55	22.8928	12	0	0	0	0	0	0	6.6	5.33	5.43	1	3.3	7.41	24.2	10.5	283	140.1	4.33	82	60.47	1.21		7.12	4.15	2.05	316	0.04		54	16	0	180
1	68	1	30	6774.96	121	70	73	155	58	24.1415	4	0	0	0	0	0	0	6.6	7.31	5.01	0				14	280	141.1	4.05	58	94.66	0.6	0.08	4.63	2.73	1.15	296	0		56	11	0	180
1	81	0	7	6896.46	127	87	106	162	45	17.1468	4	0	0	0	0	0	0	6.6	9.55	6.87	1	18.7	7.43	27.9	10.8	276	135.3	3.52	93	72.05	0.4	0.02	7.37	5.16	1.09	408	0.01	71	146	23	1	180
1	81	0	5	19848.8	131	70	100	165	52	19.1001	16	0	0	0	0	0	0	6.6	6.94	6.77	1	200	7.5	27.2	9	274	134.4	3.67	93	72.05	0.42	0.6	5.6	4.97	0.3	258	0.02		112	7	1	180
1	89	0	13	11211.4	135	74	74	165	80	29.3848	9	0	0	0	0	0	0	6.6	6.43	5.32	1	85.9	7.39	24.2	9.7	271	133.1	4.14	113	56.24	1.78	0.06	9.54	5.46	2.69	252	0.01	176	53	15	0	180
1	52	0	8	14271.4	137	77	96	165	63	23.1405	22	0	0	0	0	0	0	6.6	6.02	5.34	2		7.33	17			144	4	240.9		0.92	0.167	9.29	7.96	0.46	216	14	81	61	28	1	180
1	71	1	7	8863.16	131	85	85	164	55	20.4491	10	0	0	0	0	0	0	6.7	8.59	6.07	1		7.45	27.6	10.8	279	135.7	3.52	72	74.08	1.03	0.06	7.51	6.4	0.57	131	0		35.5	18.5	1	180
1	78	0	7	8881.01	136	91	83	161	42	16.2031	10	0	0	0	0	0	0	6.7	4.31	5.42	1		7.39	30	5.9	279	138.6	3.74	76	91.41	4.37	2.7	6.38	4.32	1.19	241	0.01	247	43	18	1	180
1	77	0	3	15994.7	110	61	75				21	0	0	0	1	0	1	6.7	7.97	7.02	3		7.38	18.1			138	5	144		0.34		10.23	9.27	0.58	59	13.2	491	401	9	1	180
1	77	0	7	23756.5	102	53	88				16	1	0	0	0	0	0	6.8	7.6	6.74	4	200	7.4	23.3	12.3	293	137.8	3.88	120	54.01	1.24		9	7.41	0.8	232	0.02		608	25	0	180
1	83	0	8	12656.3	119	63	77	176	67	21.6296	10	0	0	0	0	0	0	6.8	12.29	4.52	1	70.36	7.43	26.1	9	281	135.5	4.23	108	60.29	0.8	0.05	8.24	5.63	1.46	341	0.01	4866	150	10	0	180
1	68	0	9	32414.3	128	78	98				18	0	0	0	0	0	0	6.8	10.71	10.7	4	200	7.49	24.3	15.7	281	137.7	3.67	127	51.85	2.09	0.06	7.88	7.27	0.22	222	0.03	4220	300.8	10.8	1	180
1	78	0	4	38864.7	152	93	110				27	0	0	0	0	0	0	6.8	17.14	17.43	1		7.35	20.5	12.2	316	144.3	4.47	222	26.56	1	82.46	6.29	5.13	0.61	98	0.05		11055.9	46	1	180
1	87	0	7	10011	116	56	78	168	42	14.881	10	0	0	0	0	0	0	6.8	5.79	4.37	1	9.7	7.45	25.3	11.3	285	139.9	4.02	108	59.72	1.01	0.04	7.74	5.3	1.39	278	0.06	1130	42	8	0	180
1	84	0	1	41254.5	135	75	100				9	1	0	0	0	0	0	6.8		5.16	0	14.3	7.3	15.1			179	4.3	214.5		1	1.25	18.61	16.75	1.24	333	331.2	82	1499	78	1	9
1	84	0	5	40500.9	120	90	80				18	1	0	0	1	0	1	6.8	5.3	5.71	4	15.25	7.36	14			138	5.4	493.6		0.67	4.32	9.63	8.28	0.51	218	36.2	88	71	16	0	18
1	90	1	15	29343.4	134	85	98				17	0	0	0	0	0	0	6.9	8.13	6.57	2	159.1	7.32	20.9	14.6	289	139.2	5.83	107	44.43	4.63	0.09	10.95	9.07	1.08	278	0.06	100.3	2168.7	30.7	1	180
1	90	1	14	11626.5	130	89	88				9	0	0	0	0	0	0	6.9	7.56	5.66	2	47.12	7.41	26.2	12.3	276	137.3	3.85	74	67.7	4.04	0.04	9.5	6.76	1.81	400	0.02		102	13	1	180
1	33	0	7	67497.1	112	80	111	174	67	22.1297	34	0	0	0	0	0	0	6.9	5.69	5.44	2	13.25					137	6.9	494.1		0.43	0.476	4.34	3.39	0.53	207	30	16			1	180
1	42	0	24	36985.1	138	81	67	160	55	21.4844	7	0	0	0	0	0	0	6.9	5.62	5.59	1						142	3.8	409.7		1.18	0.834	17.3	15.2	0.611	105	59.8	4885			1	180
1	42	0	12	12082.2	126	90	62	172	70	23.6614	7	0	0	0	0	0	0	7		9.14	1						136	4.77	111.3		0.36	0.072	2.08	1.46	0.52	216	5	13	39	12	1	180
1	79	0	17	16041.5	157	74	95	180	100	30.8642	10	0	0	0	0	0	0	7	13.54	8.81	1		7.48	24.7	9.8	280	135.5	4.25	77	89.97	1.87		12.09	9.49	1.39	297	0.01	127	83	10	1	180
1	91	1	7	11172.6	130	64	66				6	0	0	0	0	0	0	7.1	7.78	7.09	2		7.31	26.9	6.7	286	137.5	4.33	92	52.79	0.94	0.14	4.7	3.72	0.8	155	0.01	470	205	10	1	180
1	71	0	4	35214.4	137	73	98	176	79.2	25.5682	8	0	0	0	1	0	1	7.1	12.99	2.99	2		7.389	18.5			133	3.42	92.7				10.76	9.83	0.46	257	9.7				1	180
1	65	0	16	27791.5	112	77	98				4	1	1	0	1	0	1	7.2	16.13	17.54	0		7.34	18.8			156	5.4	355		1.38	2.57	25.4	24.12	0.611	217	55.6	3330			0	180
1	86	1	15	165997	171	97	81				23	0	0	0	0	0	0	7.3	21.02	19.7	1						134	4.31	78		2.21		6.9	6.11	0.22	101	0.033	180	9.2	113	1	180
1	42	1	2	37271.9	120	75	71	156	51.7	21.2442	14	0	0	0	0	0	0	7.3	9.52	12.28	2		7.35	17.2			129	5.3	159			0.127	3	2.5	0.23	159	18.4	10	24	593	1	180
1	75	0	1	11997.5	145	86	90	165	75	27.5482	8	0	0	0	0	0	0	7.4	13.83	13.05	1	40.8	7.41	25.2	10.8	286	138	3.09	77	90.92	0.24	0.07	4.05	2.42	1.09	143	0.03	275	298	21	1	180
1	73	0	2	7474.97	112	92	75	175	75	24.4898	6	0	0	0	1	0	1	7.4	10.91	5.6	1	5.7	7.42	21.2	15.3	283	135.2	4.71	152	41.64	1.28	0.09	9.4	7.62	0.99	171	0.03	3270	109	23	0	180
1	54	0	3	82062.9	148	92	66	170	72	24.9135	34	0	0	0	0	0	0	7.4	9.96	9.67	2		7.3	16.4			131	3.42	126.3		1.29	0.088	7.72	6.08	0.74	203	21.8	46	59	34	1	180
1	64	0	15	17080.8	129	71	81	176	71	22.921	10	0	0	0	1	0	1	7.4	13.16	9.1	1	14.07					137	4.9	108.5		0.65	0.054	19.99	19.27	0.23	161	9.5	60			1	180
1	87	0	12	11284.1	150	68	88	157	57.5	23.3275	9	1	0	0	0	0	0	7.7	12.01	13.55	2	58.5	7.45	24.2	7.5	287	137.2	4.08	102	63.94	4.22	0.18	18.17	13.62	2.45	190	0.03	265	285	26	1	180
1	60	0	25	31409	129	89	86				4	0	0	0	0	0	0	7.7	8.09	5.5	0	2.08	7.319	20.8			138	3.9	94.7		1.36	0.052	9.83	5.64	3.17	404	1.4	27	33	17	0	180
1	44	0	20	72031.2	162	96	76	173	60	20.0474	21	1	0	0	0	0	0	8	17.17	18.62	2	14.57	7.46	24			138	6.3	180.7			0.079	5.52	5.18	0.09	100	33	74			1	21
1	85	0	6	66439.4	179	85	120				29	0	0	0	0	0	0	8.3	16.17	9.25	2	150.53	7.445	15.7			130	3.4	87.9		1.58	2.83	5.45	4.4	0.43	128	67.3	408.5	150	6	1	180
1	91	0	2	8100.99	151	100	82	162	83	31.6263	3	1	0	0	0	0	0	6.5	5.25	5.22	1	133	7.45	19.2	13.7	318	154.5	5.07	361	14.69	0.42		1.9	0.9	0.6	126	0.24	1370	1545	45	0	3
1	94	0	7	8260.17	120	76	78				8	0	0	0	1	0	1	6.5	7.04	4.8	2		7.42	19.8	15.3	297	143.4	3.89	167	35.48	0.52	0.71	6.73	4.6	1.27	175	0.09	816	189.2	13.1	0	180
1	75	0	7	9260.34	120	60	64	170	62	21.4533	8	0	0	0	0	0	0	6.5	5.98	5	1		7.45	23.6	9.8	266	131.8	4.24	108	51.55	0.76	0.3	4.25	2.7	0.83	114	0.01	145	165.8	8.9	0	180
1	93	0	7	5315.69	125	73	82	165	71	26.079	5	0	0	0	0	0	0	6.5	8.71	12.56	1		7.49	28.7	11.3	279	138.6	3.23	60	115.66	0.6	0.06	4.52	3.08	0.9	119	0.03	167	296.4	16.4	0	180
2	92	1	10	15224.4	161	85	85				14	0	0				0	3.9	7.13	5.86	1	6.8	7.38	29.3	8.1	274	136.2	2.14	64	80.52	1.25		9.49	6.93	1.35	209	0.02	5050	51.8	15.8	0	180
2	69	0	7	14494.5	120	86	70	180	66	20.3704	12	0	0				0	4.5		6.32	0		7.4	20.8			132	4.7					3.04	1.37	1.27	226	1.1	25	19	6	0	180
2	68	0	4	22692	141	60	72				13	1	0				0	4.7	6.15	5.34	1	11.11	7.34	18.4	19	298	138.4	4.44	297	19.5	1.99	6.83	8.01	6.63	0.87	370	0.36		53	13	1	13
2	87	1	10	6464.54	142	116	90	150	58	25.7778	7	0	0				0	4.8	6.65	7.6	1	20	7.43	24.8	5.6	277	136.6	3.31	84	59.14	0.48		6.36	4.59	0.9	175	0.01		43.8	9.1	1	180
2	69	1	13	6373.2	147	64	80	158	57	22.8329	4	0	0				0	4.8	6.09	5.34	1	0.8	7.4	22.9			138	3.1	63.6		0.29	0.038	5.62	3.31	1.89	189	9.5	174.7	41	15	0	180
2	86	1	7	25127.2	108	78	68				21	0	0				0	4.9	5.28	5.3	3	125.5	7.43	25.6	7.2	290	143.7	3.84	74	68.33	3.44	0.35	4.62	3.03	1.18	78			43	14	1	180
2	89	0	4	16204.7	131	69	84				10	1	0				0	4.9	5.92	4.83	1	56.1			7	274	134.9	3.35	77	87.82	1.26		4.33	2.12	1.79	187	0.07	31.4	1168.7	16.5	0	180
2	81	0	7	10564.7	179	98	112	152	56.2	24.3248	6	0	0				0	5	6.88	5.6	1	4.6	7.38	32.3	11.4	282	139.2	3.21	76.5	104.62	0.28	0.05	8.77	6.78	1.22	248	0.01	144	102	9	1	180
2	75	1	5	5042.81	120	70	90				8	0	0				0	5.1	6.88	5.01	0	4.4	7.43	23	8.7	277	136.8	3.58	93	54.3	1.43		4.45	2.77	1.15	116			2051	20.6	0	180
2	42	0	15	15421.7	134	78	87	172	68	22.9854	10	0	0				0	5.1	6.86	5.92	0						136	5.3	154.1		0.23		4.78	3.83	0.59	230	19.9	12			1	180
2	67	0	7	23350.3	121	68	82	173	60	20.0474	12	0	0				0	5.2	7.2	5.27	1	8.5	7.4	26.5	9.6	278	137.6	3.6	143	45.4	0.71		3.93	3.33	0.32	122	0.04		124	6.8	0	180
2	64	0	10	9235.08	112	72	70	168	55	19.487	8	0	0				0	5.2		4.53	1	0.37	7.41	27.4	12	283	142.8	3.32	57	133.82	1.53	0.03	8.21	5.69	1.89	289	0		87	16	1	180
2	71	0	60	9746.91	141	82	90	178	60	18.937	6	0	0				0	5.3	6.15	4.11	0		7.45	27.5	9.3	285	141.5	3.88	75	94.44	0.49	0.02	5.13	3.41	1.09	376	0.01	93.6	44	8	0	180
2	83	0	30	10306.3	134	71	98	166	44	15.9675	7	0	0				0	5.3	4.65	4.98	1	0.5	7.43	27.4	11.2	286	141.9	3.65	98	67.24	0.15	0.04	3.97	2.09	1.06	136	0.01	77.9	33	12	0	180
2	26	0	7	5258.74	115	75	78	172	68	22.9854	4	0	0				0	5.4		5.48	0		7.4	26.2	15.5	277	139.4	3.88	83	103.11	0.12	0.03	4.19	3.01	0.74	267	0		189	10	0	180
2	46	1	4	9556.01	120	83	79	145	50.5	24.019	6	0	0				0	5.4	8.46		1	7.9	7.46	28.4	7.9	280	139.5	3.17	51.1	111.02	0.69	0.03	12.36	9.2	1.99	342	0	15.8			0	180
2	60	0	12	5379.79	125	81	72	162	65	24.7676	7	0	0				0	5.4	5.97	4.26	0		7.39	24.9			140.6	3.81	78.4	79.18	0.46	0.03	8.02	4.84	2.09	298	0.001	48.1	26	9	0	180
2	36	0	37	272342	116	58	105				36	0	1				0	5.4	13.11		4	94.9	7.46	28.6		303	144	3.04	180.9	52.24	2.57	2.87	34.81	32.23	1.15	361	0.06	3140	131	14.7	1	180
2	27	1	4	2402.33	103	64	71	170	49	16.955	1	0	0				0	5.5	7.32	4.56	0				10.6	268	135.7	3.57	44	157.3		0.09	5.2	3.04	1.56	160			83.6	7.5	0	180
2	45	1	23	41912.4	128	92	88	160	50	19.5312	23	0	0				0	5.5	5.56		2	10.05	7.45	22			142	3.5	150.1		0.36	0.123	6.2	5.54	0.36	228	1.9	93	26	6	1	180
2	26	0	14	14082.6	146	85	101	170	65	22.4913	10	0	0				0	5.5		6.7	1		7.27	18.9			137	3.8	183		0.12	0.077	5.81	4.85	0.49	130	2.5	8	29	5	1	180
2	61	0	10	22974.3	149	92	61	178	78	24.6181	6	0	0				0	5.5	3.44	3.94	0	0.3					138	4.35	93		0.11		8.27	4.62	2.91	238	5.5	51	72	13	0	180
2	96	0	4	8471.17	141	117	34				10	0	0				0	5.6	7.32	4.96	1	93.7	7.4	20.9	15.8	342	162	4.47	153	39.2			17.74	13.25	1.78	290	0.1		240.2	14.1	1	180
2	90	1	4	17181.9	143	94	72	162	50	19.052	11	0	0				0	5.6	6.73	5.02	3	7.8	7.42	24	9.3	280	139.9	3.47	61	84.95	1.48	0.06	4.44	2.36	1.73	163			36	18	1	180
2	97	0	6	43552.7	189	98	89	169	52	18.2066	19	1	0				0	5.6	8.07	6.84	3	2.3	7.31	21.9	13.4	277	135.3	3.63	121	51.1	2.66		6.75	6.28	0.24	231	0.06	2070	71.3	7.5	1	19
2	84	1	7	11121.2	145	73	46	160	52	20.3125	10	0	0				0	5.6	6.46	4.04	1	0.5	7.4	25.5	12.9	230	112.6	2.6	66	78.25	1.2		8.64	6.96	0.73	289	0.09		476.2	32.6	0	180
2	88	0	15	10985.9	122	71	97				8	0	0				0	5.6	6.09	5.22	1	94.9	7.45	25.1	7.9	274	136.9	4.05	80	84.64	1.15	0.07	9.3	6.77	9.5	400	0.02	103	439	15	0	180
2	86	0	3	7873.19	149	74	81	160	60	23.4375	7	0	0				0	5.6	4.7	4.92	1		7.34	21.6			144	4.26	85.8		0.02	0.158	3.34	1.68	1.23	173	8.7	216.1	113	11	0	180
2	72	0	10	33482	147	81	77	166	53	19.2336	17	0	0				0	5.7	7.05	6.22	2	7.6	7.47	25.7	12	280	139.3	3.16	57	130.66	0.4		5.82	4.72	0.74	140	0.01		45	8	1	180
2	65	1	3	5107.63	128	81	46	150	62	27.5556	2	0	0				0	5.7		4.86	0		7.41	24.4	10.1	288	144.2	4.2	58	95.53		0.03	7.58	4.45	2.49	274	0		28	8	0	180
2	93	0	7	8098.5	123	62	69	165	51	18.7328	6	0	0				0	5.7	7.89	6.64	0		7.34	26.9	8.8	286	140.6	3.52	109	58.37	0.94	0.13	5.24	3.6	0.97	100	0.02		160	26	0	180
2	59	1	10	13216.6	123	74	82	158	53	21.2306	8	0	0				0	5.7	7.48	4.9	1	65.4	7.45	27.6	8.7	278	140	3.41	63	89.55	0.23	0.02	4.98	2.73	1.7	213	0.01	41.4	55	21	0	180
2	35	0	20	145020	124	73	77	167	42.5	15.239	17	0	0				0	5.7		7.29	0	21.35	7.4	17.4			142	5.1	189.4		0.43	0.436	5.12	4.67	0.12	73	11.8	319			1	180
2	29	0	30	31917.1	124	57	58	175	91	29.7143	9	0	0				0	5.7		7.73	1	12.47	7.42	21.6			140	4.7	101.2		0.29	0.289	8.2	7.24	0.7	185	0.4	24			1	180
2	35	0	9	22382.6	135	85	78				15	0	0				0	5.7	6.67		0	115.8	7.45	16.5	17.8		133.4	4.52	586	10.19	6.06	3.26	4.56	3.94	0.3	140	0.05	7590	373	17	1	180
2	94	1	9	9304.5	129	56	98	140	60	30.6122	12	0	0				0	5.8	5.96	5.68	1	32.7			6.4	276	138.6	3.52	49	109.39	0.73		15.75	13.67	0.94	207			76	15	0	180
2	48	1	7	6594.99	113	77	71	160	62	24.2188	5	0	0				0	5.8	5.93	6.23	1	3.4	7.43	23.4	6.5	279	140.6	3.57	57	105.27	0.3	0.04	7.1	3.09	3.31	201	0.01		30.7	9.7	1	180
2	84	0	10	14953.9	184	83	94	166	51	18.5078	16	0	0				0	5.8	4.87	4.07	3	0.5	7.46	332.1	7.6	295	145.4	3.09	68	102.3	0.53		4.27	3.15	0.64	194	0.07	871	125.2	20.8	0	180
2	84	1	7	30367.7	106	75	71	153	40	17.0874	15	0	0				0	5.8	8.3	4.8	1	1.4	7.44	32.5	7.6	268	132.5	3.29	39	144.79	0.6	0.1	9.02	6.77	1.55	307	0.04		30	12	0	180
2	80	0	7	56482.7	154	74	83				12	1	1				0	5.8	7.2	4.85	4	91.2	7.38	24	9.9	277	136.3	3.27	80	86.3	0.46	0.06	6.25	4.36	1.09	284	0.08	312	57.8	9.1	1	12
2	76	0	1	55664.8	153	92	99				5	1	1				0	5.8	10.54	7.81	4	128.49	7.47	25.4	15.5	285	139.1	3.85	172.8	32.38	0.9	0.82	10.35	9	0.37	249	0.97	12800	220.4	4.7	1	5
2	75	0	2	9767.99	131	79	99				7	0	0				0	5.8	6.2	5.23	1		7.5	25.7	9.3	270	134.4	3.7	68	104.68	0.45	1.42	11	10.25	0.56	147	0.02	663	702.2	14.6	0	180
2	60	1	2	9967.06	149	90	96	154	50	21.0828	9	1	0				0	5.8	7.44	4.45	0		7.36	27	10.5	279	140.1	3.56	49	119.83	0.33	0.05	4.62	2.47	1.7	122	0		26	18	0	180
2	72	0	5	6056.76	133	80	76	162	75	28.578	5	0	0				0	5.8	5.03	4.66	1	6.1	7.46	26.1	14.1	284	140	3.03	110	60.91	0.58	0.04	4.84	3.73	0.63	158	0		315.7	12.7	0	180
2	83	0	10	14401.3	143	91	83	170	46	15.917	12	0	0				0	5.8		4.1	1	2.56	7.33	16.8	16.3	301	138.2	4.47	412	12.84	0.72	0.39	4.89	2.22	1.95	243	0.03		30	8	0	180
2	69	0	1	53502.6	131	58	100				26	0	0				0	5.8		5.69	1	6	7.47	23.9			139	3.66	96.2		0.23	0.194	8.03	5.48	0.9	193	18	32	65	7	1	180
2	69	0	7	51576.9	135	72	64				13	1	0				0	5.8		4.31	1		7.36	21.4			136	3.93	91.6			0.068	6.97	6.18	0.71	280	8.7	21	49	13	1	13
2	72	0	7	11112.1	160	89	99	165	63	23.1405	7	0	0				0	5.9	7.8	5.4	2	43.5	7.51	25	8.9	278	137.3	3.28	95	72.2	0.71	0.08	3.18	0.87	1.52	184			344	15	0	180
2	71	1	10	198846	166	112	85	148	50	22.8269	36	1	1				0	5.9	7.28	6.83	3	11.4	7.5	25.2	10.8	278	138.6	3.14	81	63.96	1.57	0.28	6	4.55	0.88	197	0.01		90	14	1	36
2	79	0	4	32023.9	166	92	92	160	74	28.9062	13	0	0				0	5.9	9.54	4.91	3	140.5	7.44	24.4	10.2	290	142.8	3.91	65	108.44	6.7	0.05	11.88	11.12	0.64	586	0.01	16.2	201.4	11.9	1	180
2	91	1	10	44084.9	132	84	85				24	0	0				0	5.9	4.92	6.2	2	54.3	7.45	28.1	10.5	273	136.5	2.83	70	72.51	7.44	0.08	4.77	3.15	0.79	135			75	8	1	180
2	79	0	2	11842.7	137	70	84				6	0	0				0	5.9	9.21	5.46	1		7.42	26.1	7.4	278	138	2.89	66	97.7	0.68	0.17	8	5.5	1.53	148	0.03	177	1548	249	1	180
2	80	0	7	21943.5	110	64	90	165	62.5	22.9568	8	0	0				0	5.9	6.9	5.29	1	33.6	7.48	25.8	7.5	284	139.6	3.52	82	83.09	2.51	1.25	10.16	8.86	0.67	211	0.01	986	328	13	0	180
2	86	1	7	18711.9	134	62	90	148	38	17.3484	9	0	0				0	5.9	6.2	5.29	1	13.7	7.44	25.7	5.9	271	134.1	3.83	59	88.7	2.34	0.12	8.5	6.48	0.68	298	0.01	171	199	20	0	180
2	87	1	5	12345.4	139	87	78	153	40	17.0874	10	0	0				0	5.9	5.88	7.4	1	3.7	7.43	23.5	10.1	275	136.2	3.56	58	135	0.29	0.06	3.87	1.59	1.8	180	0.01	68	98	35	1	180
2	86	0	7	10289	135	78	78	165	48.5	17.8145	8	0	0				0	5.9	6.3	4.88	1		7.45	20.9	9.7	276	134.7	4.33	105	61.61	1.81	0.23	4.21	2.73	0.81	98	0.06	3780	94	14	0	180
2	33	0	7	12552.3	109	75	118	175	63	20.5714	13	0	0				0	5.9	6.38	7.46	1		7.47	22.6	11.6	275	136.5	3.85	73	113.41	2.34	11.66	8.08	7.63	0.2	226	0	22.3	64	13	0	180
2	54	0	12	4692.06	119	76	81	168	72	25.5102	4	0	0				0	5.9		4.32	0		7.45	27.1	13.3	282	141.5	3.68	67	113.6	0.32	0.03	7.46	4.05	2.52	305			30	9	0	180
2	59	0	90	29155.6	139	86	88	163	48.5	18.2544	14	1	0				0	5.9	5.97	4.68	1	77.5	7.45	28.2	6.8	265	133.3	3.76	55	141.13	2.74	0.11	9.57	6.87	1.61	437	0.01	199	69	10	1	180
2	57	0	5	15014.3	141	83	80	173	75	25.0593	5	0	0				0	5.9	5.35	6.36	2	18.1	7.34	19.5			140	3.42	82.1		0.32	0.043	5.21	4.27	0.49	182	7.1	36	284	18	1	180
2	93	1	9	7809.75	131	72	81				7	0	0				0	5.9	7.08	4.07	1	29	7.35	17.2			138	3.98	229.1		1.39	0.081	6.74	5.25	0.7	219	18.1	124	46	8	0	180
2	50	1	10	12068.2	114	68	80	160	59	23.0469	7	0	0				0	5.9	5.9	8.67	1		7.42	20.4			134	4.3	98.5			0.081	3.98	3.01	0.64	137	6.2	15	38	12	1	180
2	54	0	7	27801.7	105	65	146				6	1	0				0	5.9	15.75		4		7.432	19.9			147	5.11	153.8		21.64	7.45	13.77	12.51	0.69	380		24			0	180
2	92	1	7	7250.51	113	79	85	140	42.5	21.6837	5	0	0				0	6	6.25	7.22	1	13.3	7.45	24	14.5	221	108.8	2.23	64	80.52	2.01		3.67	2.57	0.7	108	0.08	1720	544	17.9	0	180
2	80	0	7	21108.6	150	89	90				10	1	1				0	6	9.53	5.06	4	41.3	7.45	24.8	10.8	287	138.5	3.22	211.9	29.22	0.4		6.4	5.56	0.2	188			56	31.4	1	10
2	78	0	30	54501.2	120	84	82				12	0	0				0	6	4.77	4.31	1		7.35	23.7	9.5	269	134.9	4	88	76.81	1.1	0.04	4.76	2.72	1.25	190	0.01	167	108	15	1	180
2	74	0	7	16200.6	136	72	82	165	82	30.1194	11	1	0				0	6	8.47	9.63	1		7.43	17.5	14.8	278	132	3.91	274	21.04	1.49	1.88	4.1	3.56	0.28	57	0.35	317	117	24	0	180
2	85	0	3	15883.6	155	73	106				15	0	0				0	6	10.39	7.46	3	160.2	7.48	25.7	10.2	282	138.2	3.04	87	77.26	50.62		11.42	10.04	0.5	240	0.41	1250	162	16	1	180
2	66	0	15	37863.8	145	92	98	167	52	18.6453	14	0	0				0	6	6.92	5.08	2	47.2	7.47	26.8	9.8	256	125.3	3.65	52	146.08	0.79	0.04	11.66	9.88	0.64	286	0		131	59.9	1	180
2	30	0	14	66727	119	68	113	170	68	23.5294	32	0	0				0	6		5.19	2		7.3	12.1			139	4.41	212.4		3.86	0.23	6.44	4.77	0.69	186	7.6	13	93	12	1	180
2	70	0	7		145	84	88	165	56.4	20.7163	12	0	0				0	6		8.56	1		7.4	19.5			139	5.39	883.3				6.42	6.23	0.17	174	41.5	739	58	7	0	180
2	44	1	10	13858.1	101	81	80	165	51	18.7328	9	0	0				0	6		7.03	0						142	4.1	234.9		0.35	0.271	3.16	1.82	0.67	207	4.3	4			1	180
2	69	0	5	22272.5	130	81	96	163	57	21.4536	12	0	0				0	6.1	5.96	6.96	4	31.1	7.5	29.2	8	282	139.7	3.88	51	147.65	1.15		11.9	9.29	0.84	229	0.03		212.7	33.9	0	180
2	88	0	10	16555.1	159	108	113				13	1	0				0	6.1	7.4	6.67	3	61.1	7.51	26.2	10.4	268	130.5	3.96	67	102.88	0.88		8.6	8.25	0.17	131	0.01	738	147.7	19.5	0	180
2	81	1	7	7814.2	117	71	64	157	45	18.2563	7	0	0				0	6.1	8.97	5.7	1	8.97			6.2	272	134.3	2.71	64	82.63	0.58								42	14	0	180
2	78	1	10	6583.51	131	79	85	145	38	18.0737	4	0	0				0	6.1	10.39	4.38	1		7.46	27.2	8.1	287	140.2	3.21	54	100.82	0.27	0.03	4.39	2.63	1.36	269	0.01	100	38	17	0	180
2	70	1	7	8346.34	114	68	85	162	75	28.578	7	0	0				0	6.1	8.8	4.55	1		7.42	23.5	8.8	278	138.1	3.32	68	78.77	0.32	0.05	4.11	1.05	2.28	252	0.01	57.7	95	27	0	180
2	83	0	7	14911	142	62	97				9	0	0				0	6.1	7.53	5.29	4	107	7.54	29.1	5.1	246	119.4	2.43	57	126.94	2.02	4.73	6.56	5.76	0.32	179	0.03	1070	720	23	0	180
2	57	1	7	7159.96	122	73	82	157	35	14.1994	6	0	0				0	6.1	6.77	4.09	0		7.33	19.9	14.9	300	142.7	4.42	147	33.84	0.65		8.11	6.69	0.96	162	0.02	2440	18	13	0	180
2	61	1	10	18907.9	124	73	104				15	0	0				0	6.1	8.85	5	1	32.2	7.49	27.8	6.9	267	132.1	3.63	37	163.03	1.34	0.07	12.03	11.34	0.42	360	0.01	1260	77	15	1	180
2	69	0	13	18686.8	118	71	112	176	65	20.984	13	0	0				0	6.1	6.8	6.42	1	212.66	7.378	17			126	4.01	275		7.7	100	22.18	20.96	0.62	411	866.9	3477	34	10	1	180
2	82	0	5	5782.64	146	63	70	162	55.9	21.3001	7	0	0				0	6.1	5.38		0						135	3.8	94.8		0.25		5.72	3.23	1.47	141			110	9	0	180
2	73	1	5	6426.34	126	74	61	145	52	24.7325	7	0	0				0	6.1	11.54	5.29	1	12.35	7.35	17.2			141	3.69	76.6		0.81	0.012	2.04	1.63	0.34	85	10.8	163.3	45	16	1	180
2	70	0	6	25750.3	142	88	88	168	65	23.03	15	0	0				0	6.1		4.78	3		7.4	21.5			142	3.4	73.1		0.61		3.27	2.43	0.47	185	70.4	27	56	9	1	180
2	100	1	2	8889.19	146	74	91				4	1	0				0	6.2	5.92	5.62	2		6.9	15	18.2	314	147.2	4.87	419	9	2.36	2.69	10.56	9.42	0.53	205	0.18	6430	465.1	25.5	1	4
2	83	1	5	33605.1	127	70	97	150	60	26.6667	19	0	0				0	6.2	7.53	7.35	2	138.4	7.49	28.2	10.6	271	134.6	3.43	80	63.55	0.67	0.21	6.9	5.59	0.56	211	0.01		112.3	14.4	1	180
2	74	0	30	37117.9	128	59	55	165	65	23.8751	11	0	0				0	6.2	5.64	4.8	0	200			12.8	275	137.8	3.88	119	54.91	1.47	0.1	8.13	4.7	2.29	197	0.04		113	11	0	180
2	87	0	10	187283	138	64	108	170	51.6	17.8547	26	1	1				0	6.2	9	8.62	4	215.81	7.27	21.3	17.7	309	143.8	4.88	230.2	13.6	4.59	2.31	21.29	20.26	0.34	351	0.05	11900	57.5	8.9	1	180
2	88	0	2	148351	112	65	97				21	1	1				0	6.2	5.95	5.76	4	179.7	7.38	21.6	11	277	134.8	4.49	120	52.56	4.49	0.9	8.35	6.36	0.82	148	0.03	33.1	582.4	13.7	1	21
2	56	0	7	7133.36	139	85	85	170	46	15.917	6	0	0				0	6.2	8.16	5.03	1		7.43	23.9	9.6	281	138.9	4.05	61	127.07	0.26	0.34	7.55	5.49	1.26	127	0.01	68.8	272	17	0	180
2	87	0	10	24114.2	121	75	77	160	64	25	12	1	0				0	6.2	5.48	5.18	4	137.4	7.51	23.9	10.8	293	145.2	2.91	55	130.43	35.93	0.06	7.99	6.47	0.76	203	0.01	620	184	13	1	12
2	82	0	2	9966.59	121	74	89	165	60	22.0386	7	0	0				0	6.2	6.84	4.34	1	14.7	7.44	17.7	8.4	286	141.1	3.86	103	63.43	0.82	0.05	4.25	1.54	1.93	423	0.02	145	66	10	0	180
2	79	0	5	36136.8	132	66	85				7	0	0				0	6.2	4.86		1		7.44	24	7.3	280	138.5	3.73	102	59.96	0.66	0.91					0.01				1	180
2	65	0	12	3647.74	113	71	86	170	69	23.8754	6	0	0				0	6.2		5.05	1	4					140.7	3.34	75		0.46	0.04	5.04	3.05	1.39	196	0.004	0.01	104	14	0	180
2	87	1	4	9288.39	126	69	86				7	1	0				0	6.3	7.1	5.62	3	131.3	7.41	18.7	9.7	284	138.8	4.33	127	36.6	15.97	0.11	8.66	7.19	0.88	165	0.04		45.5	8.7	1	7
2	84	0	3	21393.5	154	94	104	161	60	23.1473	21	0	0				0	6.3	7.55	4.75	2	109.4	7.4	18.2	14.5	311	147.5	3.8	250	22.78	106.1	0.77	5.97	4.77	0.66	165	4.39		321.4	41.8	0	180
2	77	0	10	12259.7	135	72	68	160	56	21.875	7	0	0				0	6.3	8.14	4.33	1	0.5	7.41	26.8	14.3	272	134.1	3.87	89	76.13	0.13	0.1	7.74	4.57	1.9	274	0.04	31.55	90.7	9.2	0	180
2	83	1	14	8611.67	147	77	72	148	35	15.9788	9	0	0				0	6.3	7.9	4.42	1	197.6	7.43	32.8	4.7	275	134.5	3.21	45	276		2.13	22.51	20.5	0.71	329	0.01	2280	16	14	0	180
2	71	0	6	18626.1	114	76	91				10	1	0				0	6.3	6.85	5.03	3	87.4	7.47	27.6	6.2	284	138.3	4	76	93.17	10.03	0.68	6.47	5.78	0.47	294	0.02	945	1316.2	12.4	1	180
2	89	0	20	16515.4	161	86	79				8	0	0				0	6.3	5.28	4.62	1	72.9	7.26	18.1	8.3	296	144.3	4.45	181	32.66	0.87	0.1	4.71	3.02	0.99	169	43		69	19	0	180
2	39	0	14	29718.2	132	110	86	172	69.5	23.4924	12	0	0				0	6.3		5	0	3.94					138	4.3	146		0.61	0.089	3.41	1.92	0.84	105	11.6	7			1	180
2	51	0	14	17502.3	139	98	65	170	67	23.1834	8	0	0				0	6.3		7.37	1	7.44					139	4.6	133		0.23	0.094	2.22	1.39	0.52	193	6	14			1	180
2	34	0	10	19008.6	130	85	98	164	64	23.7954	11	0	0				0	6.3	6.77	7.57	2		7.32	16.2			135	3.53	169.4		0.15	0.122	6.31	5.09	0.75	153	29.5	95	134	16	1	180
2	62	0	14	24659	128	78	109	165	48	17.6309	22	0	0				0	6.3		7.51	1		7.4	19.2			130	4.69	124.3		0.29		5.15	4.46	0.37	339	8.4	11			1	180
2	68	0	18	19182.8	156	91	79				14	0	0				0	6.3		7.46	3	129.9	7.32	17.9			140	4.36	135.5		0.87	0.14	4.92	4.36	0.31	185	2.3	100	70	9	1	180
2	79	0	3	12716.2	137	71	90	150	64	28.4444	11	0	0				0	6.3	7.42	5.84	1	54.22					134	4.4	115.9		2.84	0.307	10.13	7.63	0.83	262	7.4	185.4	76	14	0	180
2	65	1	7	17954.6	136	74	84				7	0	0				0	6.3	16.94	18.25	1		7.463	22.9	11.9	358	163.7	3.55	98.2		8.37		16.62	15.09	4.3	113	0.012	651	601.8	11.3	1	180
2	84	0	15	21435	101	75	74				12	1	0				0	6.4	4.68	7.46	3	200	7.46	23.7	12.5	284	141.6	5.34	88	75.66	9.54		12.54	11.56	0.53	148	0.07	633	182.4	21.5	1	12
2	63	0	21	15956.8	115	60	80				22	0	0				0	6.4	5.72	6.08	1	141	7.38	27.4	11.9	269	134	4.05	63	119.1	0.47		7.37	5.64	0.92	347			270.1	33.6	1	180
2	59	1	7	7056.11	135	83	79				8	0	0				0	6.4	14.22	5.81	0				11.4	289	141.3	2.79	55	104.72	0.41	0.04	4.17	2.63	1.11	182	0.01	14.1	68	12	0	180
2	82	0	7	46050.9	101	69	86				26	0	0				0	6.4	6.14	4.45	2	116.69	7.4	18.7			134	3.3	90		1.46	0.569	11.89	10.84	0.61	216	15.1	19	166	3	1	180
2	34	0	12	24085.7	125	89	94	170	62.5	21.6263	13	0	0				0	6.4	6.9	5.16	2	14.47	7.28	16.1			138	5.53	199.1		0.37	0.164	2.44	2.06	0.3	202	10.1	44	957	22	1	180
2	73	0	4	137638	151	103	123				20	1	1				0	6.4		6.56	4	211.62	7.38	17.6			141	4.79	72.2		3.27	1.37	23.1	20.38	0.95	399	12.7	54	1645	52	0	20
2	91	0	4	4902.64	172	88	66				2	1	0				0		7.11		3		7.5	23.7		305	148.4	4.08	138.2	38.17			9.36	7.84	0.99	312	0.07	995	186	19.2	1	2
2	53	1	22	10276.2	138	86	665	155	53	22.0604	8	0	0				0		5.33	4.41	1	0.5	7.42	25.5	12.7	289	142.2	3.63	78	71.44	0.19	0.02	7.96	5.1	2.38	241	0	10.4	47	11	0	180
2	82	0	7	13504.7	127	80	79	165	62	22.7732	8	0	0				0		5.98	6.27	0	10.7	7.47	25.1	14.2	270	134.3	3.53	87	77.83	0.14	0.09	2.8	1.47	0.73	163			50.7	8.4	0	180
2	57	0	7	15908.2	129	77	80	170	73	25.2595	10	0	0				0		5.92	5.08	1	200	7.43	29.5	10.3	284	141.9	3.5	68	110.68	0.52	0.42	11.15	7.67	1.48	147			1507.9	12.6	1	180
2	40	1	4	5760.65	103	81	86	152	60	25.9695	2	0	0				0		10.28	3.98	2	49.4	7.41	25.3	14.9	278	137.5	4.56	53	117.68	0.16	0.05	6.26	5.24	0.7	309			75.8	13.6	0	180
2	59	0	7	12655.7	150	85	85	176	87	28.0863	7	0	0				0		4.01	5.6	1	40.3	7.29	22.6	11.3	283	141.2	3.77	78	94.21	0.7	0.03	8.51	4.91	2.36	288			66	6	1	180
2	51	1	8	9237.42	124	76	70	157	65	26.3702	7	0	0				0		10.58	5.31	1	113.8	7.42	25.8	11.5	280	1137.5	3.65	57	104.4	0.89	0.31	7.75	6.27	0.75	365			69	8	0	180
2	50	1	14	10304.1	118	81	95	158	63	25.2363	9	0	0				0		6.28	4.85	1	1.1	7.42	26.5	10.3	289	145.3	3.62	46	146.18	0.57	0.04	18.72	13.75	3.63	169	0		128.2	12.7	0	180
2	31	1	8	10876.1	124	76	70	157	65	26.3702	7	0	0				0		8.07	5.31	1	62.3	7.42	25.8	9.4	284	140.5	3.37	57	104.4	0.84	0.31	7.75	6.27	0.75	365			69	8	0	180
2	43	1	6	10245.8	128	76	89	154	48	20.2395	5	0	0				0		6.45	4.86	2	6.7	7.45	24.6	10.3	286	143	4.45	64	93.1	0.32	0.05	4.47	2.84	1.04	157	0.01		48.8	13	0	180
2	86	1	8	14574.8	131	97	101	140	52	26.5306	3	1	0				0		6.49	5.35	4	57.1	7.48	23.5	9.4	279	139.7	2.41	135	34.2	9.58	0.03	13.73	11.62	1.02	221	0.02	230	140	11	1	3
2	32	1	6	10101.7	119	90	85	170	57	19.7232	5	0	0				0		4.07	4.33	1	30.4	7.49	24.5	10.2	269	136.4	4.36	54	120.81	0.14	0.06	3.67	2.49	0.68	195			108	10	1	180
2	81	0	8	14733.7	134	87	78	165	70	25.7117	10	0	0				0		4.8	4.9	1	158.4	7.48	26.3	13.1	263	131.2	3.69	74	93.21	3.84	0.05	7.01	4.42	1.83	161			246	14	0	180
2	70	0	14	15718.5	131	79	79	162	67	25.5296	10	0	0				0		7.37	4.58	1	22.9	7.43	24.2	11.7	275	136.8	3.34	74	96.02	0.42	0.06	7.01	2.99	3.69	207			87	16.7	0	180
2	50	0	8	10537.7	133	87	88	170	62	21.4533	9	0	0				0		9.85	13.6	1	188.1	7.45	24.6	10.1	276	134.5	3.48	70	110.35	1.62	0.08	7.85	6.98	0.19	174			20	6.6	0	180
2	58	0	8	6713.52	109	77	81	173	66	22.0522	5	0	0				0		6.47	11.27	2	14.9	7.45	25.3	10.3	283	141	4.13	75	98.75	1.15	0.11	3.02	1.66	0.82	80			120	15	0	180
2	64	0	7	9290.78	130	85	108	166	55	19.9594	3	1	0				0		7.12	6.92	3	93.3	7.39	21.5	3	288	143.2	4.62	291	20.23	2.09	12.55	5.59	4.56	0.76	136	1.19		8000	32.5	1	3
2	75	1	12	7560.74	148	87	75	158	58	23.2335	3	0	0				0		9.22	6.61	2	72.3	7.44	23.4	11.9	286	141.2	3.71	50	109.9	0.53	0.12	5.83	5.34	0.43	142			102	7	0	180
2	60	1	6	9899.45	130	72	85	154	50	21.0828	5	0	0				0		5.75	5.82	2	10.1	7.42	23.4	9.9	273	137.1	3.79	74	73.51	0.29	0.04	4.7	3.58	0.83	162			29	9	0	180
2	80	0	7	11496.5	136	86	94	168	59	20.9042	4	0	0				0		8.7	6.29	2	89.3	7.41	26.1	7.3	262	129.4	3.62	80	86.3	0.6	0.11	5.86	3.65	1.32	158	0.02	92.6	113.7	17.6	0	180
2	62	0	9	11736.5	121	57	103	153	62	26.4855	8	0	0				0		6.11	5.23	2	88	7.42	25	9.2	268	133.5	3.7	79	92.06	0.38	0.12	5.17	3.63	1.2	230			331	12	0	180
2	54	0	7	8270.26	142	98	97	172	76	25.6896	7	0	0				0		7.7	5.24	0	0.5	7.42	25.1	11.5	276	137	3.75	71	107.07	0.34	0.07	4.59	2.75	1.28	150			130	15	1	180
2	96	0	7	15901	147	66	93	167	60	21.5139	6	1	0				0		6.59	13.15	2	193.9	7.45	26.8	15.4	322	151.9	3.61	379	12.72	1.56	11.14	9.54	7.82	1.23	127	0.47		164.6	8.4	1	6
2	84	0	5	10174	141	97	60				5	1	0				0		7.14	22.74	3	60.6	7.41	22.7	8.6	290	139.4	4	165.3	32.29	1.84	6.31	6.4	5.8	0.41	2220			104.8	9.1	0	5
2	47	1	4	13921.3	113	83	111	158	50	20.0288	6	0	0				0		5.7	7.28	0	188.3			11.3	252	125.4	4.19	81	69.55		0.78	10.1	6.87	1.3	226			20.9	8.7	0	180
2	51	0	3	8620.89	141	88	61				7	1	0				0		11.66	3.93	2	15.9			5.6	288	134.6	5.2	264	23.66	0.41		6.1	4.82	0.76	28			5629	67	0	180
2	87	0	3	7990.06	106	67	125				3	1	0				0		8.07	8.08	2	200	7.44	21.2	9.1	341	162.8	3.45	178	33.57	1.36	0.03	4.66	2.23	1.32	128	0.01	202	123	10	0	3
2	66	0	6	7171.64	103	73	98	165	57	20.9366	3	1	0				0		8.65	6.76	2	191.5	7.43	28.6	10.6	308	142.1	3.85	158	40.58	0.55	9.64	17.29	15.54	0.24	277			35	12	0	3
2	85	1	1	3313.71	135	78	78				2	0	0				0			13.27	1	86.7			13.1	287	137.5	3.74	94	52.37		0.14	4.44	59.8	1.17	146	0.04		497	18	0	180
2	82	0	5	16895.8	102	60	75				15	1	0				0		9.33		2	25.5	7.38	25.3	14.9	296	142.8	3.94	119.4	48.53	5.58		12.34	10.48	0.42	212	0.06		3190.7	31.6	1	180
2	75	0	10	12232.6	152	77	85	160	57	22.2656	10	0	0				0		8.17	5.24	1	149.2	7.44	23.9	9.3	271	134.1	4.27	66	107.91	0.77	0.06	5.04	4.15	0.54	173	0.01	72.7	223.3	9.8	0	180
2	75	0	7	21329.4	148	89	103	165	50	18.3655	20	0	0				0		7.69	8.53	1	66.3	7.47	27.9	12.9	286	141.3	4.13	131	49.25	1.12		6.8	4.39	1.37	98	0.04	1200	2353.4	61.2	1	180
2	95	1	2	2306.64	164	97	121				1	1	0				0		6.85	8.3	1	0.5	7.44	19.8	12.4	285	136.3	4.25	77	68.62	34.62		13.29	11.3	0.9	367	0.91	9810	91.6	24.1	1	1
2	80	1	30	8282.27	120	60	76	153	39	16.6603	7	0	0				0			4.35	1				12.1	274	136.8	3.8	74	69.34		0.04	4.12	2.82	0.81	215			62	9	0	180
2	87	0	3	15641.7	150	83	84	163	57	21.4536	9	1	0				0		7.03	7.57	3	164.4	7.55	24.7	13.6	279	135.5	3.31	113	56.5	0.89	5.22	10.96	9.44	0.57	344	0.07	1830	870.1	9.5	1	9
2	85	0	2	23988.5	102	68	82				19	0	0				0		6.1	4.64	1	20.1	7.56	38.9	5.7	263	131.4	3.09	113	50.79	0.5	0.12	4.2	2.42	0.97	110	0.15	160	278.9	13.9	1	180
2	50	1	9	105776	103	75	144				22	0	1				0		5.19	6.4	4	13.2	7.48	31.4	10.5	289	141.2	2.73	77	73.25	4.62	0.36	18	15.26	1.46	169	0.43	6950	105	55.9	1	180
2	91	0	8	14358.9	192	82	67				9	0	0				0		7.6	5.66	1	55.7	7.41	19.9	9.9	277	131.7	4.87	149	40.63	1	0.08	8.47	6.34	1.06	222	0.04		173	11	0	180
2	91	0	7	12502.6	93	64	77	160	61.5	24.0234	11	1	0				0		4.15	4.11	1	5.3	7.41	24.1	10.4	285	138.3	4.7	187	31.28	1.02	0.08	7.15	4.98	1.36	392	0.09	925	40	15	0	180
2	81	0	1		133	90	95				33	0	1				0		7.52	5.87	4	2.9	7.42	27.7	10.9	298	147	4.06	42	177.8	1.31	0.05	9.6	6.66	1.69	386	0.01	431	60.5	20.6	0	180
2	83	0	10	210481	118	79	78				27	1	1				0		7.61	5.01	4	94.7	7.49	20.9	9.1	281	138.2	4.02	151	40.84	2.05	0.3	7.72	6.05	0.86	129	0.01	7850	346.2	12.2	1	27
2	41	1	15	24734.1	85	55	95				19	0	0				0		6.01	4.83	3	30.1	7.39	26.6	10	293	148.3	2.57	19	393.26	0.79	0.15	5.18	3.86	0.69	310			53	4	0	180
2	75	0	10	21380.6	113	68	76	162	61	23.2434	14	0	0				0		5.69	4.9	2	73.8	7.47	26.6	8	278	137.8	4.77	95	71.61	4.85	0.06	3.44	2.37	0.49	110			373	29	1	180
2	69	0	7	16465.5	170	106	80	158	60	24.0346	8	0	0				0		9.3	4.14	2	55.6	7.42	23.6	11.4	285	140.6	3.85	87	80.6	0.3	0.14	6.69	4.78	1.18	368	0.01	40.9	214	14.6	1	180
2	79	0	4	16719.8	142	75	66	171	68	23.255	8	0	0				0		6.15	5.29	2	142.2	7.45	24.5	9.6	276	137	3.69	91	74.04	1.55	0.24	8.78	5.2	1.65	329	0.01		67	14	0	180
2	97	1	3	8471.18	135	90	97				5	0	0				0		5.51	4.42	2	3.3	7.48	25.2	13.3	253	124.6	3.42	74	66.68	0.83	0.13	2.31	1.33	0.51	237	0.06	814	209.2	21.6	1	180
2	81	1	14	46672.6	139	95	97	150	76	33.7778	14	1	0				0		4.82	4.48	4	190.8	7.3	18.9	11.9	295	136.8	5.12	174	25.86	0.56	0.27	12.72	11.79	0.69	135	0.04	6170	43	22	1	14
2	71	0	9	13479	157	98	86	168	65	23.03	8	0	0				0		11.08	5.98	2	101.54	7.43	25.4	10.3	276	135.6	3.24	51	146.8	0.25	0.04	6.33	4.48	1.13	213	0		55.2	6.8	1	180
2	63	0	21	11998.6	124	92	107	163	66	24.841	7	0	0				0		10.59	5.02	2	2.4	7.41	24.7	11.1	290	142.5	3.4	70	105.29	0.46	0.03	8.49	5.72	1.75	378	0.01	26.8	85.7	11.5	1	180
2	67	0	14	42628.2	160	80	110	170	94	32.526	15	0	0				0		7.47	5.28	4	200	7.47	29.8	5.6	291	144.7	3.51	50	151.54	4.57	0.1	15.98	12.23	2.24	162	0.01	683	76.3	14.6	1	180
2	68	0	15	18749	132	90	115	173	64	21.3839	10	0	0				0		5.71	5.64	2	0.5	7.41	26	8.6	277	138.4	3.7	77	92.75	0.57	0.05	10.17	8	1.33	499	0.01	58.9	68.9	10.9	1	180
2	56	0	30	7571.68	133	89	88	170	63	21.7993	3	0	0				0		5.93	4.62	0	1.5	7.43	28.1	12.8	280	140.1	3.62	66	114.5	0.16	0.04	5.9	3.84	1.45	211			43	12	0	180
2	73	1	6	9857.9	111	66	73	156	49	20.1348	5	0	0				0		4.49	4.3	2	7.6	7.4	23.9	13.2	280	142	3.29	64	84.39	0.49	0.02	3.33	1.32	1.78	117	0		77	9	0	180
2	68	0	6	50234.2	129	76	86				30	0	0				0		11.27	4.07	1	196.4	7.45	25.1	11.8	287	142.8	4.37	55	137.12	3.61	1.93	13.35	12.51	0.47	270	0		195.9	11.4	1	180
2	61	0	12	24159.8	123	68	95	172	70	23.6614	13	0	0				0			13.15	2	151.5	7.5	24.4	10.2	272	135.3	4.56	85	84.64	0.35	0.21	5.65	3.17	1.88	103	0.02	271	42.1	3.2	1	180
2	85	0	5	37343.4	117	74	95				17	0	0				0		11.14	6.88	2	182.5	7.45	22.8	11.3	280	135.2	2.29	161	37.82	1.33	0.54	13.98	12.26	0.81	145	0.01	188.2	45.8	16.2	1	180
2	83	0	21	8759.15	145	85	78				4	0	0				0		9.1	7.96	2	75.2	7.43	24.3	11.2	280	137.8	3.91	89	74.98	0.93	0.06	6.45	4.53	1.28	243			22	9	1	180
2	78	1	11	32829.2	143	83	94	125	38	24.32	18	0	0				0		3.83	4.05	2	6.1	7.43	25.5	9.2	284	143.3	3.76	48	116.05	3.25	0.04	7.83	5.89	1.35	459	0.01	62.8	36.4	14.1	1	180
2	87	1	10	48959.5	110	90	70				24	0	0				0		7.7	5.16	4	168.9	7.43	24.5	4.1	272	135.3	3.93	69	74.25	1.32	0.06	6.71	5.2	0.91	317	0.01	306	25.5	7.4	1	180
2	49	1	6	15303.3	99	61	80	170	64	22.1453	13	0	0				0			6.46	1	2.8	7.43	26.4	9.8	277	139.3	3.87	49	124.86	0.07	0.02	2.78	1.23	1.34	136			66	11	0	180
2	73	0	10	21039	144	78	88	162	66	25.1486	11	0	0				0		6.43	5.47	2	200	7.38	21.4	13.4	274	136.5	4.01	112	59.08	1.16	0.17	6.17	4.54	0.81	242			73	5	0	180
2	89	0	21	42377.1	141	77	79				21	0	0				0		5.02	4.61	1	5.3	7.4	23.7	10.3	273	137.3	3.77	57	125.16	0.75	0.05	8.32	4.56	1.44	200	0.01	489	76	10	0	180
2	92	0	1	29087.3	118	57	74	165	64	23.5078	16	0	0				0		4.99	4.95	1	62.1	7.43	25.4	12.2	278	138.2	3.82	78	86	0.31	0.16	3.71	2.41	0.72	104	0.01	122.2	83.9	5.1	0	180
2	95	0	3	35586.2	125	68	100				20	0	0				0		10.75	6.36	2	61.2	7.33	23.3	11.3	300	142.8	4.13	124	50.05	1.67	1.21	110.55	9.76	0.5	290	0.01	529	48.3	15.3	1	180
2	91	1	20	56242.4	143	75	71	140	50	25.5102	22	0	0				0		6.86	4.94	4	11.3	7.39	20.7	11	295	144.2	4.7	129	35.69	12.3	0.06	4.96	3.57	1	186	0.04	2760	34.6	14.2	1	180
2	58	0	30	26591.3	120	80	80	160	44	17.1875	17	0	0				0		6.26	4.37	1	38	7.42	22.7	6.9	283	140.8	3.69	81	89.81	3.24	0.08	4.06	3.11	0.52	168	0		21	6	1	180
2	96	1	12	53885.3	156	91	87				23	0	0				0		6.13	5.07	4	192.3	7.42	23.9	10.1	282	138.3	3.69	81	60.16	0.65	0.12	8.36	5.09	1.8	157	0.01	271	20	4.2	1	180
2	65	1	15	4910.16	122	78	82	165	45	16.5289	5	0	0				0			4.56	0	10.2			11.3	280	141	3.82	64	86.4		0.05	4.63	3.01	1.1	253			83	15	0	180
2	26	1	30	6423.21	119	89	72	158	50	20.0288	12	0	0				0			4.1	0	14.8			12.4	277	140.6	3.57	51	133.56		0.06	6.26	4.44	1.08	215			120	11	0	180
2	76	0	7	9669.89	124	74	98	167	56	20.0796	2	1	0				0		9.37	4.02	4	184.4	7.46	26.9	12.8	279	139	3.81	99	67.75		1.88	7.77	4.99	1.62	250			156	13	0	2
2	48	0	10	5359.38	129	60	85	175	61.5	20.0816	8	0	0				0		5.1	4.02	1	23.5			11.7	247	124.3	3.83	52	155.83		0.08	3.23	2.42	0.33	147			230	27	0	180
2	53	0	10	5589.86	132	75	79	160	57	22.2656	6	0	0				0		5.68	4.13	1	3.7			11.4	281	141	4.02	45	180.7		0.03	4.62	2.29	1.55	274			40.3	28.2	0	180
2	93	0	7	10482.3	117	76	86				8	1	0				0		6.65	6.26	2	161.7			14.8	296	143.6	4.43	105	60.64		0.24	10.96	9.69	0.76	184			3082.9	26.5	1	8
2	84	0	4	5995.02	124	65	89	170	52	17.9931	6	0	0				0			5.18	1	167.7			12.6	272	136.2	3.52	73	93.81		0.16	4.25	2.03	1.83	102			70	10	0	180
2	74	0	3	12225	147	78	113	170	69	23.8754	11	1	0				0		5.89	5.87	1	75			7.7	279	138.2	5.25	75	93.65	0.57	0.69	10.53	9.14	0.53	221			91.2	17.4	0	180
2	98	1	14	11859.9	130	80	70				14	0	0				0		3.35	5.19	1	158.4			11.7	257	127.9	4.22	64	79.49		2.32	6.64	5.86	0.51	82		598	88	18	0	180
2	80	0	2	8959.23	121	73	65	157	73	29.6158	9	0	0				0			4.49	0	107			17.7	286	136.2	3.69	180	33.56		0.36	3.98	2.87	0.93	223			419	24	1	180
2	84	0	7	17911.3	155	83	99				8	1	0				0		12.42	5.46	4	170.5	7.53	28.6	12.9	297	139.2	3.93	95	69.98		0.85	6.04	5.05	0.59	163			586.5	10.6	1	8
2	60	0	8	10710.2	130	86	88	170	70.5	24.3945	7	0	0				0		5.82	5.14	4	151.6			12.9	277	139.4	3.51	60	126.43		0.05	5.09	3.14	1.28	175			57	7	0	180
2	91	1	10	10824.9	102	64	79				11	0	0				0		6.61	4.53	1	54.7	7.46	24.5	9.5	267	131.5	4.47	61	84.76		0.05	4.23	3.09	0.45	155	0.01	215.1	40.7	6.9	0	180
2	84	0	10	7755.84	128	70	86	160	73	28.5156	10	0	0				0			5.34	1	107.3			11.8	244	121.8	3.45	58	122.22		0.05	3.96	2.49	0.79	148			242	13	0	180
2	94	1	7	8623.18	135	77	79	145	38.5	18.3115	9	0	0				0			3.75	1	7.9			10.3	281	142	3.51	70	72.34		0.05	4.97	2.33	1.8	251			52	12	0	180
2	86	0	15	11879.5	127	74	107				8	0	0				0		7.81	3.84	1	200	7.48	33.4	6.9	291	140.9	3.61	82	81.88	9.65	0.59	12.98	12.13	0.66	365	0.01	2340	31	8	1	180
2	72	0	7	11124.7	128	74	130	175	75	24.4898	36	1	0				0		7.62	6.6	1	200	7.36	41.9	12.8	299	145.1	4.82	100	67.8	1.54	10.24	13.25	11.52	0.81	249			268	12	0	36
2	80	1	5	126422	106	60	74				25	0	1				0		4.69	5.77	4		7.4	24	9.5	257	128.3	3.97	69	75.53	2.18	0.13	8.12	7.27	0.27	204	0.02		58.6	12	1	180
2	61	0	5	21639.4	106	70	76				18	0	0				0		8.98	8.15	2	141.9	7.43	23.6	9.9	285	138.8	3.85	66	112.53	8.65	2.51	23.8	21.68	1.5	236	0.01	463	54.3	2.7	0	180
2	71	0	13	31139.6	144	79	74	175	78	25.4694	21	0	0				0		6.6	5.11	4	129.3	7.38	24.1	10	268	132.3	4.12	61	95.51	1.65	0.02	9.55	8.03	1.26	219	0.01		45.9	23.4	1	180
2	85	0	10	85941.6	137	78	88	57	168	517.082	20	0	1				0		7.59	7.99	4	200	7.37	23.5	11.7	278	136.5	4.29	64.5	84.61	58.43	0.33	11.72	9.38	1.28	281	0.03	514	67.6	7.7	1	180
2	60	1	7	19416.5	100	82	89	62	163	424.037	13	0	0				0			4.71	1	0.5			10.3	288	145.5	3.15	47	125.07	0.12	0.03	2.44	1.19	1	165			51	15	1	180
2	85	0	15	3168.94	126	75	82	160	71	27.7344	5	0	0				0			5.73	0				11.2	280	140.2	4.41	124	51.19	0.46	0.05	4.13	2.49	0.85	181			54	10	0	180
2	83	1	2	4471.12	154	100	102				4	0	0				0			4.9	1	10			13.2	264	131.7	4.1	81	61.96		0.09	5.53	2.88	1.69	135			180	14	0	180
2	70	0	3	6661.46	136	59	78				8	0	0				0		6.72	4.96	1	90.4			11.9	263	130.5	3.56	62	118.5		0.16	8.73	6.74	0.97	157			425	16.1	0	180
2	86	1	3	5820.06	134	65	82				8	0	0				0		6.45	5.44	1	26.4			11.6	278	133	4.08	189	42.79	1.84	0.12	6.05	4.28	1.19	159			5129.1	41.2	0	180
2	64	0	2	11595.4	106	71	95	178	60	18.937	10	0	0				0		6.04	5.1	1	28.1			8.6	273	134.7	3.53	62	120.67		0.44	7.42	6.12	0.12	198			34.5	10.1	0	180
2	78	0	7	10674.9	151	101	95	168	55	19.487	7	0	0				0		11.97	6.79	1	42.2			14.9	292	142.2	3.91	87	78.62		0.17	7.94	6.11	1.01	191			117.2	11.9	0	180
2	89	1	7	8886.83	134	96	89	145	55	26.1593	5	0	0				0		8.2	6.31	1	7.1	7.4	20.5	14.3	284	137.3	3.34	165	26.95	0.67	0.17	5.65	2.85	2.04	226	0.03		152.4	25.9	0	180
2	85	0	10	6138.77	144	73	118	170	60	20.7612	60	0	0				0			5.35	1	110.9			9.3	268	134.4	4.27	74	92.3		0.06	5.84	4.28	0.81	328			67	6	0	180
2	81	0	7	10064.1	168	103	124	170	65	22.4913	7	0	0				0		9.65	8.3	1	192.3			11	283	139.8	4.13	157	39.18		0.1	8.65	5.68	1.62	6			46	12	0	180
2	72	1	1	12964	116	65	91	160	50	19.5312	10	0	0				0		4.88	5.49	1	28			28	263	131.5	3.63	56	98.73		0.13	7.86	6.2	0.96	291			75	10	0	180
2	73	0	7	12409.6	145	93	85	162	65	24.7676	9	0	0				0		5.21	4.83	1	39.4	7.41	26.6	11.7	281	141.7	3.8	71	100.71	0.64	0.03	5.32	3.31	0.97	366	0		52	7	0	180
2	67	1	30	9751.63	119	76	78	158	71	28.441	7	0	0				0		5.35		1		7.46	26.1	13.9	275	137.4	3.95	53.5	94.36	1.13	0.07	4.34	2.59	1.05	290			71	23	0	180
2	79	0	7	9175.99	147	71	110	170	58	20.0692	8	0	0				0			4.14	1	83.6			11.5	275	137.7	3.59	73	94.99		0.12	8.82	6.37	1.1	283			51	9	0	180
2	64	0	10	7219.39	114	66	65	165	60	22.0386	8	0	0				0			4.48	1	2.6			11.9	283	142.4	4	82	86.94		0.03	5.48	2.15	2.31	206			91	17	0	180
2	74	0	10	12157.9	154	92	94	170	52	17.9931	9	0	0				0		4.61	7.68	1	10.7			11.6	277	137	4.35	64	113.42		0.03	6.2	4.22	1.06	232			45	10	1	180
2	47	1	17	8313.51	108	74	78	158	53	21.2306	9	0	0				0			3.97	1		7.37	24.9	13.5	276	139.6	3.52	59	100.27	0.21	0.02	8.27	4.79	2.56	683	0.01		29	5	0	180
2	88	1	21	17046.3	139	88	96				16	0	0				0			6.77	1	9.2	7.29	24.2	8.7	282	139.9	4.42	69	74.08	7	0.09	5.29	4.55	0.57	370	0.01		24	8	1	180
2	90	0	14	7884.74	130	80	110				5	1	0				0		5.47	5.97	2				14.4	312	150.8	2.89	92.5	62.46	11.13	0.12	6.23	5.1	0.43	100	0.02	1330	83.2	15	0	180
2	38	0	22	13515.4	155	90	88	173	69	23.0546	12	0	0				0			8.52	0	9.37	7.4	16			133	5.3	126		0.82		1.87	1.59	0.19	117	3.7	70	70	10	1	180
2	43	0	21	44961.3	135	88	86	170	52	17.9931	14	0	0				0			5.12	0		7.4	15.3			131	5.5	177.6		0.59	0.14	3.16	1.78	0.77	170	13.3	63	104	15	1	180
2	87	0	8	19644.6	135	82	72				14	1	0				0			5.8	1	41.7	7.5	25.4	13.2	279	139.4	3.47	74	91.87	0.66	0.05	7.12	5.18	1.3	202	0.01	394	106.6	32.9	1	180
2	43	0	6	60429.9	121	80	72	162	56	21.3382	18	0	0				0			7.35	3		7.32	16.8			143	4.5	126.9		0.51	0.164	12.32	11.48	0.39	179	5.7	154	31	9	1	180
2	71	0	30	31055.3	95	65	100				8	1	1				0			3.23	2		7.51	18.3	16.7	262	128.6	4	184.8	32.89	3.49	4.55	3.43	2.25	0.43	113	0.01	2160	307	125	1	8
2	69	0	11	4812.04	134	84	95	170	69.5	24.0484	4	0	0				0		8.37		1		7.33	16.3			138	4.3	210.2		0.42						4.2	38	140	27	1	180
2	30	0	12	29591	125	85	100	165	52	19.1001	11	0	0				0		5.34	9.78	1	36.23	7.34	19.5			138	3.7	118.7		0.5	0.154	11.52	10.04	0.63	176	9.8	21	68	17	1	180
2	69	0	7	7290.78	121	79	113				6	0	0				0		5.12		1	3.37	7.33	23.1			136	4	63.4		0.2		8.07	5.88	1.25	481	11.1	54	56	13	1	180
2	83	0	11	37313.6	140	60	85				18	0	0				0		6.37	5.51	1		7.47	23.1			134.9	4.09	185.5		0.61	0.05	4.43	3.12	0.66	186	0.024	53.7	200.5	4.7	1	180
2	42	0	32	72190.8	134	84	86	172		0	9	0	0				0		3.7	3.02	0						137	3.06	179				2.43	1.95	0.2	111					1	180
2	36	0	14	12498.2	125	80	80	174	87	28.7356	7	0	0				0		6.45	6.11	1	7.11	7.31	16.3			139	4.68	258		0.21	0.061	8.99	7.72	0.76	177	4.1	124	30	11	1	180
2	65	0	15	17141.4	127	78	75	158	51	20.4294	8	0	0				0		9.11	7.91	1	4.52	7.4	19.5			135	3.6	127.5		1.47	0.049	10.13	8.01	1.17	275	2.7	49			1	180
2	83	1	7	37186.8	134	76	86				26	1	0				0				2	116.58	7.4	22.2			137	3.2			2.29	0.156	5.13	3.71	0.81	234		159			1	26
2	60	1	15	37186.8	158	100	95	158	56	22.4323	5	0	0				0		5.6		1	102.9					137	3.95	77		0.22		7.51	5.2	1.4	418	1.9	22	89	10	0	180
2	60	1	12	21236.1	96	66	91				15	0	0				0		4.75	4.93	1	40.4	7.39	21			132	3.62	75.6		0.89	0.039	2.62	1.24	0.9	210	4	37	24	9	0	180
2	73	1	18	9498.72	145	72	70	152	46	19.91	18	0	0				0		5.83	5.16	2	1.61	7.38	22.5			139	3.7	72.5		0.16	0.024	6.06	4.19	1.23	191	10.6	29	35	5	0	180
2	43	1	8	32512.5	125	78	98	157	53	21.5019	17	0	0				0		8.13	6.66	2	43.82	7.3	15.9			132	4.31	229.6		0.21	0.338	3.62	0.42	2.95	136	18	48			1	180
2	44	0	11	16420.7	124	75	78	173	76	25.3934	8	0	0				0		5.8	13.96	2	14.36	7.36	17.5			130	4.47	202.7		0.44	0.225	4.96	3.65	0.63	117	11.5	18			1	180
2	47	1	14	24220.5	157	107	104	158	50	20.0288	8	0	0				0		5.48	6.3	2		7.34	19			138	4.1	99		0.54		8.84	8.44	0.18	93	49.7	685	20	5	1	180
2	82	0	3	8441.27	151	59	60				7	0	0				0		4.76	5.38	0		7.36	23.5			135	3.9	156.1			0.14	26.33	16.63	2.91	169	8.3	122			0	180
2	82	0	4	15308.3	154	78	54				8	0	0				0			4.61	1	29.3	7.41	27.4			138.7	3.2	72	96.97	1.54		4.92	3.27	1.24	255	0.011	203.8	82.4	9.5	1	180
2	45	0	9	33397.5	132	84	85	172	68	22.9854	10	0	0				0		10	9.48	1	3.37	7.39	20.8			139	4.1	227.5		0.38	0.255	25.33	23.91	0.43	200	12.1	164			1	180
2	44	0	23	69221.5	144	99	102				20	0	1				0		9.15	8.27	4		7.37	18.9			139	4	99.3		13.59	10.3	12.15	11.66	0.26	234	20.1	230	42	21	1	180
2	66	0	30	11134	114	79	80	162	42	16.0037	6	0	0				0		6.43	5.93	1						138.6	3.08	90.1		1.68	0.128	3.4	2.41	0.5	226			119	14	0	180
2	87	0	7	6302.15	165	94	78	170	47	16.263	5	0	0				0		7.66		1	0.8	7.35	18.9			141	3.6	106.9		5.83	0.027	10.65	6.35	3.3	166	10.8	534	42	16	0	180
2	79	1	12	19360.9	126	62	80	137	45	23.9757	18	0	0				0		10.57		3		7.37	20.8			136	3.65	65.4		2.8	0.142	3.37	2.68	0.54	272		704	90	44	1	180
2	65	1	14	21355.6	130	66	103	166	65	23.5883	24	0	0				0			4.88	3		7.37	21.9			137	3.26	59.1			0.068	3.45	2.07	0.7	196	4.7	32	28	16	1	180
2	52	1	14	18017.3	119	69	75	152	54.3	23.5024	9	0	0				0		7.99	6.27	2		7.33	17.8			144	4.06	114.5			0.361	2.7	2.28	0.36	158	2.6	94	42	10	1	180
2	74	0	15	18089.7	143	81	90				13	0	0				0		5.59	5.44	1		7.4	21.3			125	3.5	85.7		0.67	0.096	6.13	5.11	0.67	205	10.6	63			1	180
2	90	1	12	132296	123	77	102				17	1	1				0		6.38	6.53	4	166.5	7.29	12.6			140.1	4.63	398.1		0.93	1.68	6.54	4.32	0.75	175	0.09	26900	55	12	1	17
2	59	0	14	58794.4	94	68	102	170	54	18.6851	26	0	0				0		8.47	9.85	3		7.31	16.5			132	4.1	130.7		0.81	0.09	9.81	8.16	0.41	359	10.4	162	30	13	1	180
2	51	0	14	19198.4	116	67	73	167	58	20.7967	12	0	0				0			8.67	2		7.3	17			139	5.29	145.5		0.45	0.097	3.73	2.81	0.5	130	10.7	206			1	180
2	94	0	10	12778.9	132	66	75				11	1	0				0		7.43		1	41.7	7.33	17.6			139	3.96	201			0.096	9.72	7.71	1.19	146	33.3	420	22	3	1	11
2	71	0	4	6721.68	105	72	84				5	0	0				0				1		7.35	23.7			134	2.9	77		0.58	0.089	5.89	3.25	2.03	187	5.6	9	52	10	0	180
2	43	0	14	18015.2	95	67	62	155	57	23.7253	9	0	0				0		7.85	5.96	2		7.3	15.9			131	4.57	91.6		0.37		2.27	1.85	0.33	226	24	51	77	12	1	180
2	77	0	7	11017.9	115	70	73				6	0	0				0			5.87	0						135	4.15	92.3		0.32		4.81	3.53	0.72	138	6.5	53	24	11	0	180
2	34	1	8	9259.87	117	84	84	158	75	30.0433	7	0	0				0		7.42	6.05	1	29.88	7.36	22.4			138	3.61	62.9		0.27	0.102	4.63	2.75	1.46	268	0.9	28	62	7	0	180
2	48	0	7	18855.8	113	52	58	165	62.5	22.9568	15	0	0				0		4.92	4.22	3	260.46	7.4	20.3			134	3.61	804.5		4.14	0.246	4.18	3.48	0.26	123	396.9	1392	71	7	1	180
2	68	0	15	12761.2	146	91	98				7	1	0				0		5.88	4.39	2	129.1	7.43	23.3			137.4	3.45	73		0.79	0.57	3.92	2.99	0.74	52	0.012	24.5	304	34	1	180
2	50	1	14	9020.83	120	78	86	168	54	19.1327	9	0	0				0		5.99		1	0.83	7.34	21.4			140	3.54	71.4		0.27	0.003	5.3	2.14	2.56	186	9.9	30	116	7	0	180
2	86	0	9	8520.07	128	78	105				2	1	0				0		10.01		1	102.4	7.39	15.8			139	5.1	140.8		0.98	0.382	9.05	8.57	0.2	145	35.6	140	145	22	1	2
2	92	1	6	27875	107	76	100				14	0	0				0		7.02	8.69	2		7.34	17.8			136	3.9	94.7		0.58	1.46	9.19	8	0.47	252	143.8	197	204	64	0	180
2	57	0	4	38824.1	122	61	111				10	0	0				0		6.77	5.73	2		7.41	25.9			145.2	3.92	107		2.74		41.79	39.77	1.49	951			55	22	1	180
2	46	0	10	14324.3	100	62	70	168	69	24.4473	8	1	0				0				1	12.54					140	5.3	165.5		0.16	0.074	4.75	4.22	0.34	133	4.8	17			1	180
2	87	0	10	5910.75	161	83	81	165	65	23.8751	9	0	0				0			5.63	1					280	139.1	3.37	83	80.69	1.41	0.11	7.49	5.66	1.17	177		51	82	7	0	180
2	50	1	7	17882.5	81	61	99	156	55	22.6003	9	0	0				0				0																				1	180
2	80	0	3	29592.3	124	74	104				10	0	0				0		5	13.35	3	122.76	7.39	18.2			150	4.2	100.1		0.87	0.545	17.38	16.04	0.93	249	12.8	27	355	12	1	180
2	92	0	10	71945.5	149	114	82				27	0	0				0			5.72	0																				1	180
2	63	0	10	10830.2	128	78	85	175	75	24.4898	12	0	0				0		7.77	5.94	1	34.28	7.36	19.2			135	3.6	69		0.11	0.077	4.25	2.36	1.08	160	6	19	333	16	0	180
2	56	0	7	6140.54	128	84	80	165	77	28.2828	6	0	0				0		6.87		0		7.35	20.6							0.15	0.048	4.16	2.41	1.18	169	2.9	14	119	12	0	180
2	65	0	6	19581.2	120	82	73				14	0	0				0		5.03	8.08	3	93.86	7.36	20.2			135	4.1	61.3		1.19	0.088	4.21	2.86	0.93	160	3.5	17	213	3	1	180
2	84	1	7	16887.1	125	76	95				19	0	0				0		9.08	5.41	1		7.38	25			135	2.7	53.8		0.33	0.105	7.54	5.7	0.76	232	18.2	43	99	16	1	180
2	68	0	5	10532.1	124	70	96	156.5	60	24.4975	5	0	0				0		7.44	5.72	2	84					147.2	2.99	160	39.82	1.06		4.66	3.4	0.55	193			79	18	0	180
2	39	0	4	6121.52	128	91	90	183	65	19.4094	16	0	0				0		6.58		0	128.01					135	3.5	72.7		0.38		7.98	6.63	0.53	150	1.1	26	58	7	0	180
2	52	0	12	10585.6	108	72	90	170	71	24.5675	13	0	0				0			5.18	1	20.35	7.37	22.3			141	4.33	78.6			0.092	5.8	3.68	1.5	344	1.7	17	109	7	0	180
2	83	0	11	12146	143	78	90	168	65	23.03	9	0	0				0			8.48	2	34.65	7.38	22.8			139	3.81	80.7		0.31	0.202	4.56	3	1.13	164	5.8	9	65	14	0	180
2	79	0	5	12146	108	71	77	165	75	27.5482	8	0	0				0		6.03	5.19	1	55.2					132	3.34	81.3		0.35	0.2	5.07	3.28	1.02	178		28.2	141.8	14.8	1	180
2	32	1	5	6419.4	99	77	100	165	51	18.7328	6	0	0				0				1		1.82								0.14		3.4	1.78	1.14	185	1.9		485	19	0	180
2	57	0	4	2815.78	98	57	80	172	88.5	29.9148	6	0	0				0			5.91	1		7.39	23.6		280	139.9	3.97	84.7		0.48		7.88	5.67	1.46	293					0	180
2	40	0	1	14177.9	143	107	145				29	1	0				0			14.79	4		7.26	14.9			143	3.3	152.3		19.41	9.02	26.69	25.29	0.69	350	283.6	37	429	60	0	29
2	68	1	4	6013.17	126	72	81	154	56	23.6128	7	0	0				0			6.06	0						141	3.5	85				2.64	1.38	0.94	107	3.8		172	19	0	180
2	78	0	15	8391.75	136	76	110	184	79	23.3341	3	1	0				0		8.7		4	17.3	7.27	36.1			136	4.2	56.9		1.24	0.416	9.79	9.23	0.16	191	20.2	413	117	12	1	3
2	83	0	4	8784.52	117	63	82				11	0	0				0		6.4		1	155.33	7.4	21.8			140	3.3	84.6		0.95	2.64	20.49	10.16	0.95	111	26.8	74	182	9	0	180
2	74	0	10	6602.56	145	85	91	177	84	26.8122	3	0	0				0		5.33		0						139	4.48	84.9		0.23		9.41	6.12	2.6	299	2.7	14			0	180
2	67	0	3	22098.4	127	93	70				23	0	0				0		6.42	4.58	1	117.44	7.48	22.4			127	4.8	53.4		0.72	4.95	2.65	27.9	1.38	94	7.5	79			0	180
2	49	0	30	18109.5	151	81	80				15	0	0				0		4.81	5.45	1	31.61	7.44	23.5			143	3.5	1413.4		0.45		4.53	2.81	0.72	144	110.7	1372	687	36	0	180
