# Supplementary material for: Correlation of diabetes and adverse outcomes in hospitalized COVID-19 patients admitted to a tertiary hospital in China during a small-scale COVID-19 outbreak
Source: PeerJ. 2025 Jan 27;13:e18865. doi: 10.7717/peerj.18865 (PMC11781264; doi:10.7717/peerj.18865)
Supplement: Supplemental Information 3 [file peerj-13-18865-s003.xlsx]

## Sheet: Sheet1
Number	Meaning
0(Death, ICU, DKA, Diabetic Nephropathy, Hyperglycemic Hyperosmolar Coma, Diabetic Complications，Steriods)	no
1(Death, ICU, DKA, Diabetic Nephropathy, Hyperglycemic Hyperosmolar Coma, Diabetic Complications，Steriods)	yes
1(group)	with diabetes
2(group)	without diabetes
0(gender)	male
1(gender)	female
0(Oxygen)	no
1(Oxygen)	low flow oxygen inhalation
2(Oxygen)	medium flow oxygen inhalation
3(Oxygen)	high flow oxygen inhalation
4(Oxygen)	mechanical ventilation
